# Supplementary material
Source: PubMed Central journal article supplement (PMC6298125)
Supplement: pnas.1809317115.sapp.pdf [file pnas.1809317115.sapp.pdf]

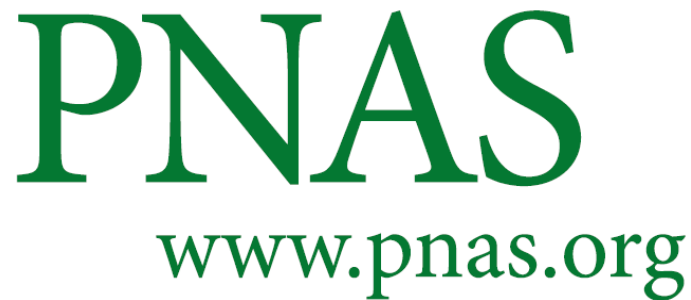

## Supplementary Information for

Species interactions limit the occurrence of urban-adapted birds in cities

Paul R. Martin & Frances Bonier

Corresponding author: Paul Martin

Email: [pm45@queensu.ca](mailto:pm45@queensu.ca)

### **This PDF file includes:**

Supplementary text

Figs. S1 to S14

Tables S1 to S6

References for SI reference citations

Additional Acknowledgments

List of the cities included in this study

List of the bird species examined in this study

Literature reviewed for behavioral dominance relationships

References used for assessing breeding range overlap of cities

### **Other supplementary materials for this manuscript include the following:**

Dataset and R code are available at the Dryad Digital Repository:

<https://doi.org/10.5061/dryad.t85bf04>

## Supplementary Text

### Supplementary Methods and Results.

**Selection of Species.** In twelve cases, the youngest, phylogenetically-independent species comparisons involved more than two species. For example, *Melospiza melodia* is dominant to both *M. georgiana* and *M. lincolnii* (sister species) that are equally divergent from *M. melodia*. We have no data on dominance relationships between *M. georgiana* and *M. lincolnii*, so we included the three species (*M. melodia* dominant, *M. georgiana* and *M. lincolnii* subordinate) as one phylogenetically-independent comparison. For this reason, the 142 phylogenetically-independent comparisons in our study incorporate 296 species in total (rather than 284 species expected if each comparison represented only two species).

In two cases, multiple species pairs were not phylogenetically independent, and one species was both dominant and subordinate to two different species at equal genetic distances. In these two cases (*Falco*, *Sterna*), we included only the species pair with the most data (i.e., data from the most cities across both species in the species pair). We took this approach rather than including all of the data because one species could not be coded as both dominant and subordinate at the same time.

**Phylogeny.** We imported our maximum clade credibility tree into R using the R package *ape* (1), and exported the tree in Newick format for editing. Once exported, we made 3 edits. (i) We updated the names of species to match those of the International Ornithologists' Union (2) that we use in our dataset, necessary to match the data with

branches in the phylogeny. (ii) One of the branch lengths in the phylogeny was negative and thus nonsensical (*Acrocephalus – Sylvia/Turdoides*). We changed this value to positive and adjusted the branch lengths immediately downstream so that all branches remained ultrametric. (iii) One of our focal species, *Corvus cornix*, was missing from ref. 3 because the taxonomy used in that source considered it to form one species with *C. corone*. Thus, we added *Corvus cornix* as the sister lineage to *C. corone* in our phylogeny (following ref. 4), and specified a branch length of 0.003 to reflect a divergence time on the order of a few thousand years (4). After these modifications, we imported the new phylogeny using *ape* (1) for use in our statistical analyses.

**Spatial Autocorrelation.** We tested for the effects of spatial autocorrelation in our analyses by calculating Moran's I values and their significance for [(rescaled breeding occurrence values - MCMCglmm model predicted values)/(standard deviation of rescaled breeding occurrence values)] using the R package *ncf* (5). We also plotted spatial autocorrelation by geographic distance between cities (correlograms) using the *spline.correlog* function in *ncf* (5) (Fig. S11). Moran's I values were significant, but very small and negative overall: main model (predictors = dominance \* sympatry \* urban-breeding propensity), correlation = -0.0012,  $P = 0.003$ ; continent model (predictors = dominance \* sympatry \* urban-breeding propensity \* continent), correlation = -0.0010,  $P = 0.002$ ; economic development model (predictors = dominance \* sympatry \* urban-breeding propensity \* economic development), correlation = -0.00087,  $P = 0.005$ . Correlograms, however, revealed significant, positive spatial autocorrelation at short distances between cities (clustering) (Fig. S11), particularly in the main model, and thus

we ran additional models that incorporated spatial autocorrelation to test our hypotheses. We knew of no straightforward way to incorporate spatial autocorrelation into Bayesian generalized linear mixed models [MCMCglmm (6)], so we used generalized least squares (gls) models in the R package *nlme* (7) instead. We initially chose MCMCglmm models because alternatives (linear mixed-effects [lme] and gls models) did not fit our data well. Nonetheless, lme and gls models provided similar results to MCMCglmm models that did fit well, suggesting that any lack of fit did not overly influence the main results of lme/gls models.

We first compared the performance of gls models with the same predictor variables, but with different forms of spatial autocorrelation (Exponential, Gaussian, Spherical, Linear, Ratio), and compared these again to a linear mixed-effects model that did not incorporate spatial autocorrelation but included species pair as a random effect. All models used restricted maximum likelihood; we assessed model performance using Akaike Information Criterion (AIC) estimates. Models that incorporated exponential spatial autocorrelation performed best (lowest AIC; same result for our main model and models with continent and economic development), so we incorporated the exponential form into our subsequent gls tests.

We next re-ran our analyses using gls models incorporating exponential spatial autocorrelation. We first compared models with different combinations of variance heterogeneity with the goal of finding the best fit possible for each model (following ref. 8). We ran all combinations of variance heterogeneity (fixed effects were the same for all models) using restricted maximum likelihood and AIC values to identify the best-performing model for each analysis. We then tested the importance of the focal

interaction term by comparing AIC values for models using maximum likelihood and differing only in the inclusion of the interaction term (our main effect). R code for these analyses are available from the Dryad Digital Repository:

<https://doi.org/10.5061/dryad.t85bf04>.

Our analysis incorporating spatial autocorrelation revealed similar results (Table S5). The interaction between dominance, sympatry, and urban-breeding propensity improved the gls model controlling for spatial autocorrelation ( $\Delta\text{AIC} = -12.5$ ), with breeding occurrence varying as a function of behavioral dominance, sympatry, and urban-breeding propensity (3-way interaction,  $P = 0.0001$ ). The interaction between our main effects and continent no longer improved model fit once spatial autocorrelation was included ( $\Delta\text{AIC} = +0.4$ ), as we expected given that continental effects reflected spatial clustering. In contrast, our main effects again varied as a function of economic development: dominant species had higher occurrence values in cities compared with closely-related subordinate species, but only when the species pair was sympatric, adapted to urban environments, and occurred in countries with developed economies ( $P < 0.0001$ ) or countries in economic transition ( $P = 0.029$ ). Among the alternative hypotheses to explain continental variation, only economic development improved model fit overall, and in an interaction with our main effect. All other predictor variables did not improve model fit (positive  $\Delta\text{AICs}$  for all) when included in an interaction with our main effect in models incorporating spatial autocorrelation (Table S5). These results suggest that economic development was the only predictor to explain variation in our main effects beyond spatial clustering.

**Dominance Data.** Our dataset comprised 142 species pairs for which dominance relationships have been described in the literature. These included cases where we could reanalyze raw competitive interaction data (binomial tests of wins;  $N = 76$  species pairs), cases where dominance was tested using statistical tests on the results of experiments (e.g., song playback experiments;  $N = 4$  species pairs), and cases where the dominance relationship was described in the literature but the interaction data were not accessible for reanalysis ( $N = 62$  species pairs). We had greater confidence in dominance relationships among species pairs for which we could statistically test for dominance asymmetries (i.e., where raw data were accessible, or where statistical tests of behaviors had already been performed). Thus, we retested our main findings using the subset of species pairs for which we had the highest confidence in dominance relationships ( $N = 80$  species pairs), predicting that our main results should persist in this subset of our data.

Re-running our main analyses with this subset ( $N = 80$  species pairs) yielded similar results. In allopatry, breeding occurrence values of dominant and subordinate congeners again did not differ as a function of their propensity to breed in cities [MCMCglms; differences in linear slopes (subordinate relative to dominant) in allopatry, estimate = -0.096, 95% CI: -0.19, +0.0028,  $P_{MCMC} = 0.054$ ]; in sympatry, however, urban-adapted dominant species were more widespread than subordinate congeners [differences in linear slopes (subordinate relative to dominant) in sympatry, estimate = -0.59, 95% CI: -0.69, -0.49,  $P_{MCMC} < 0.0001$ ; Fig. S12]. This general pattern again depended on the level of a country's economic development (Fig. S13). In developed countries, breeding occurrence values of dominant and subordinate congeners did not differ as a function of urban adaptation in allopatry [difference in slopes

(subordinate relative to dominant) in allopatry, linear component estimate = -3.63, 95% CI: -7.87, +0.50,  $P_{MCMC}$  = 0.09; polynomial component estimate = -2.36, 95% CI: -6.41, +1.73,  $P_{MCMC}$  = 0.26], while urban-adapted dominant species were more widespread than subordinate congeners in sympatry [difference in slopes (subordinate relative to dominant), linear component estimate = -18.39, 95% CI: -22.00, -14.76,  $P_{MCMC}$  < 0.0001; quadratic component estimate = -1.78, 95% CI: -5.35, +1.75,  $P_{MCMC}$  = 0.32; Fig. S13]. Countries in transition between developing and developed economies also showed no difference in occurrence between dominant and subordinate congeners as a function of their propensity to breed in urban habitats in allopatry [difference in slope (subordinate relative to dominant) in allopatry, linear component estimate = -3.69, 95% CI: -18.00, +10.48,  $P_{MCMC}$  = 0.61; quadratic component estimate = +4.65, 95% CI: -6.66, +15.57,  $P_{MCMC}$  = 0.41], while urban-adapted dominant species were more widespread than subordinate congeners in sympatry [difference in slopes (subordinate relative to dominant) in sympatry, linear component estimate = -13.79, 95% CI: -20.56, -7.08,  $P_{MCMC}$  < 0.0001; quadratic component estimate = +8.87, 95% CI: +2.10, +15.49,  $P_{MCMC}$  = 0.009; Fig. S13]. Analysis of data from developing countries showed no difference in occurrence between dominant and subordinate species as a function of urban adaptation in allopatry [difference in slopes (subordinate relative to dominant) in allopatry, linear component estimate = -0.83, 95% CI: -5.00, +3.28,  $P_{MCMC}$  = 0.69; quadratic component estimate = +3.66, 95% CI: -0.41, +7.66,  $P_{MCMC}$  = 0.07]; urban-adapted dominant species, however, were marginally more widespread than subordinate species in sympatry, although they showed no clear decline with increasing propensity to breed in cities [difference in slopes (subordinate relative to dominant) in sympatry, linear component

estimate = -7.73, 95% CI: -14.08, -1.24,  $P_{MCMC} = 0.018$ ; quadratic component estimate = +6.96, 95% CI: +0.74, +13.22,  $P_{MCMC} = 0.029$ ; Fig. S13].

**Cultural Bias.** Different cultural backgrounds of our survey respondents could have influenced how they perceived and responded to our survey questions. Such cultural bias could have influenced our results, particularly the variation that we found among different levels of economic development. Accounting for potential cultural bias is difficult because some observers did not share the cultural background of the countries to which they responded. For example, professional bird guides raised or living in Western countries (e.g., USA, UK, Sweden) provided data on the breeding birds of some cities in developing countries (e.g., in South America, Asia, and Africa).

We expected cultural bias to have a more pronounced effect on subtler distinctions between occurrence that are more open to different interpretations (e.g., local versus widespread breeders), rather than simpler, unequivocal distinctions of presence versus absence. Thus, we reanalyzed variation in our main results with a country's economic development using a simplified dataset that included only presence or absence of species as breeders in cities. The results of this test were similar to the results of the main analysis (Fig. S14). In developed countries, breeding presence/absence of dominant and subordinate congeners again did not differ as a function of urban adaptation in allopatry [difference in slopes (subordinate relative to dominant) in allopatry, estimate = +0.23, 95% CI: -0.84, +1.31,  $P_{MCMC} = 0.67$ ], but urban-adapted dominant species were more likely to be present than subordinate congeners in sympatry [difference in slopes (subordinate relative to dominant) in sympatry, estimate = -2.77, 95% CI: -3.62, -1.95,



$P_{MCMC} < 0.0001$ ; Fig. S14]. Developing countries showed no difference in presence/absence between dominant and subordinate species as a function of urban adaptation in allopatry [difference in slopes (subordinate relative to dominant) in allopatry, estimate = +0.39, 95% CI: -0.40, +1.23,  $P_{MCMC} = 0.33$ ] or sympatry [difference in slopes (subordinate relative to dominant) in sympatry, estimate = -0.44, 95% CI: -1.44, +0.54,  $P_{MCMC} = 0.37$ ; Fig. S14]. Countries in transition between developing and developed economies showed no difference in presence/absence between dominant and subordinate congeners as a function of their propensity to breed in urban habitats in allopatry [difference in slope (subordinate relative to dominant) in allopatry, estimate = -0.49, 95% CI: -2.35, +1.35,  $P_{MCMC} = 0.61$ ], but showed patterns intermediate between developing and developed countries in sympatry [difference in slopes (subordinate relative to dominant) in sympatry, estimate = -1.32, 95% CI: -2.60, -0.056,  $P_{MCMC} = 0.035$ ; Fig. S14].

## Presence/Absence

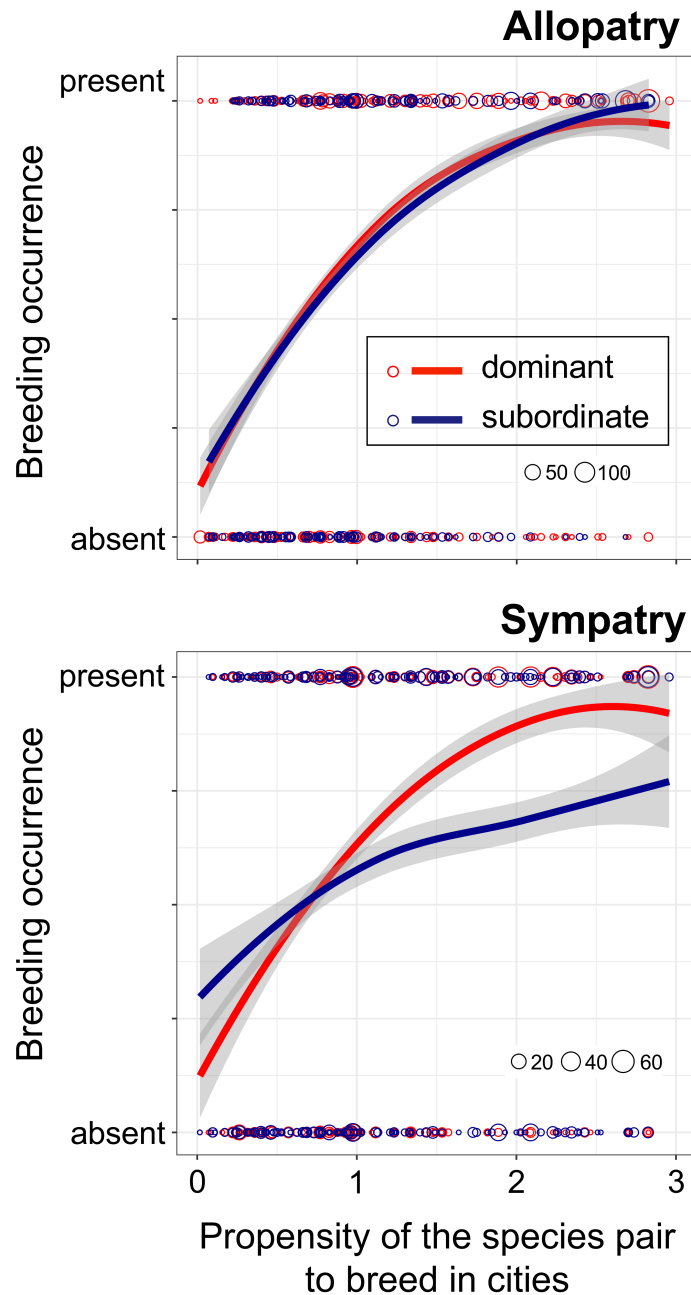

**Fig. S1. Presence versus absence of birds breeding in urban habitats as a function of dominance status, range overlap, and propensity for species pairs to breed in cities.** Breeding occurrence values greater than zero were categorized as “present” and zero values as “absent.” Upper panel shows data for allopatry (i.e., cities where focal dominant and subordinate congeners did not overlap their breeding ranges); bottom panel shows data for sympatry (i.e., cities where focal dominant and subordinate congeners overlapped breeding ranges). The effect of dominance depended on both sympatry and the propensity for species pairs to breed in cities

(Categorical [bivariate] MCMCglmm,  $P_{MCMC} < 0.0001$ ). In allopatry, dominant and subordinate congeners did not consistently differ in their breeding occurrence values in urban habitat (Categorical MCMCglmm, difference in slopes,  $P_{MCMC} = 0.22$ ). In sympatry, dominant species were more widespread than their subordinate congeners when species pairs had a high propensity to breed in cities (Categorical MCMCglmm, difference in slopes,  $P_{MCMC} < 0.0001$ ). Lines (red = dominant species; blue = subordinate species) are loess splines (span = 1.5) with 95% confidence limits shown in gray. Point size reflects the number of overlapping points (see legend at bottom right of graphs).

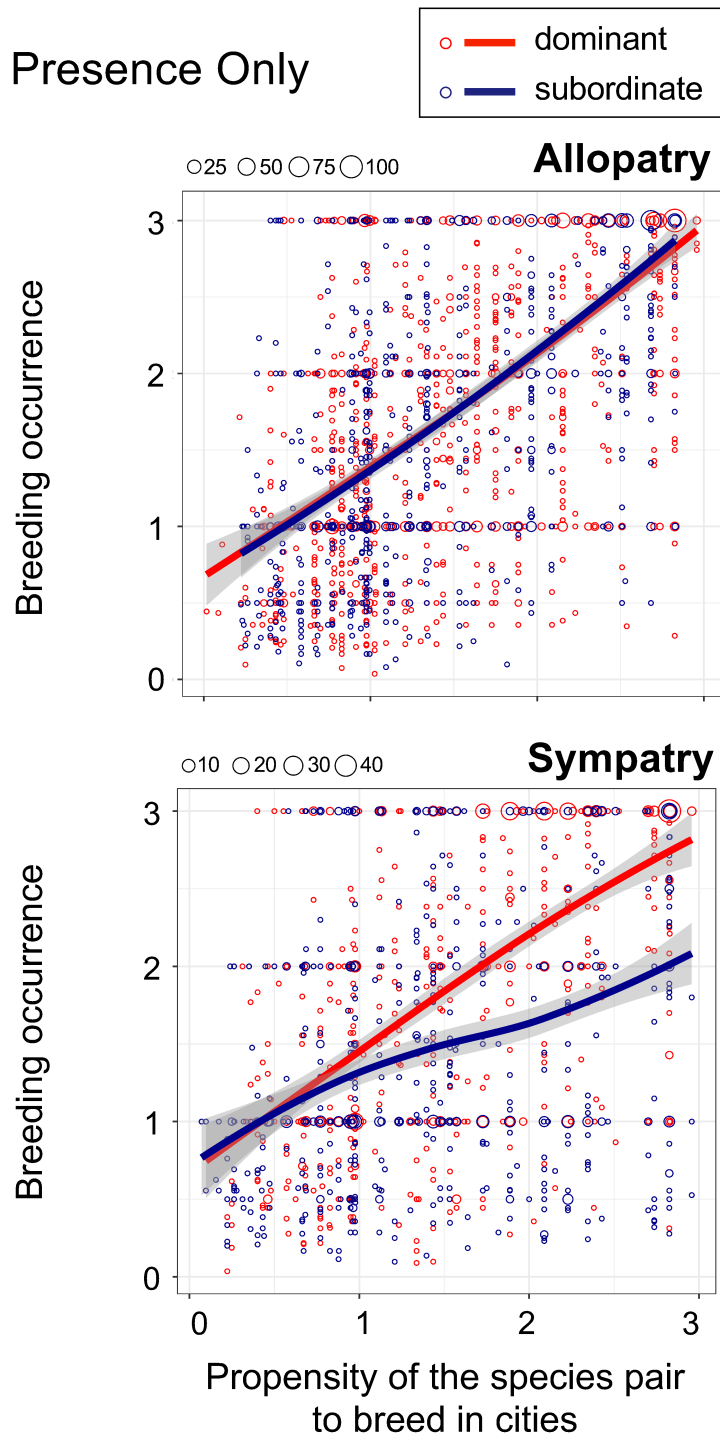

**Fig. S2. Presence (only) of birds breeding in urban habitats as a function of dominance status, range overlap, and propensity for species pairs to breed in cities.** Plots reflect breeding occurrence values restricted to cases where the species was present breeding in urban habitats (i.e., all zeros removed). Thus, for sympatric species, we included occurrence data for

species that were present, even if their congener was absent (i.e., had a value of zero for occurrence, and thus was dropped). Upper panel shows data for allopatry (i.e., cities where focal dominant and subordinate congeners did not overlap their breeding ranges); bottom panel shows data for sympatry (i.e., cities where focal dominant and subordinate congeners overlapped breeding ranges). The effect of dominance depended on both sympatry and the propensity for species pairs to breed in cities (MCMCglmm,  $P_{MCMC} < 0.0001$ ). In allopatry, dominant and subordinate congeners did not consistently differ in their breeding occurrence values in urban habitat (MCMCglmm, difference in slopes,  $P_{MCMC} = 0.14$ ). In sympatry, dominant species were more widespread than their subordinate congeners when species pairs had a high propensity to breed in cities (MCMCglmm, difference in slopes,  $P_{MCMC} < 0.0001$ ). Lines (red = dominant species; blue = subordinate species) are loess splines (span = 1.5) with 95% confidence limits shown in gray. Point size reflects the number of overlapping points (see legend at top left of graphs).

## A Data

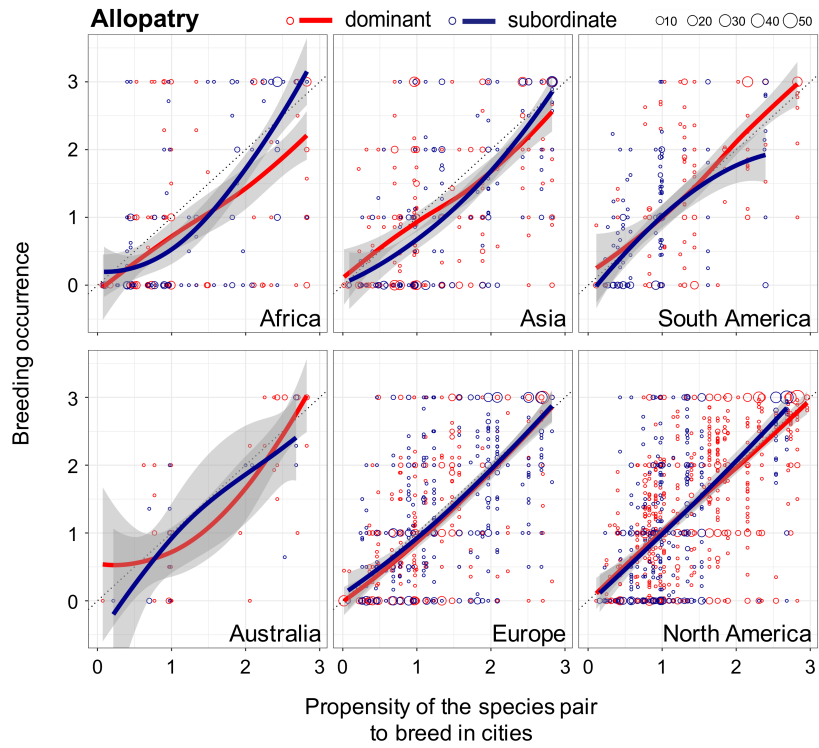

## B Model

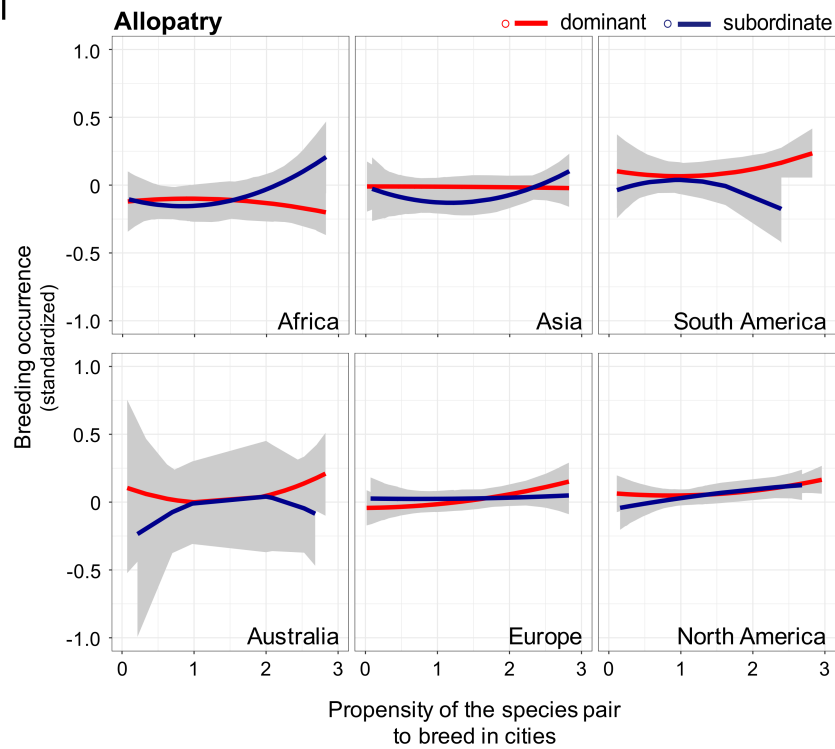

**Fig. S3. Geographic variation in the urban-breeding occurrence of dominant and subordinate bird species in allopatry.** Panels show only cases where dominant and subordinate species did not overlap their breeding ranges (allopatry). See Table S2 for statistical results. See

caption of Fig. 2 in the main text for definitions of axes. Solid lines (red = dominant species; blue = subordinate species) are (A) loess splines (span = 1.5) with 95% confidence limits shown in gray, and (B) model predicted values with 95% confidence limits shown in gray from a MCMCglmm analysis. Slopes in (B) are flattened relative to slopes in (A) because statistical models in (B) incorporated standardized breeding occurrence values (y-axes) = [breeding occurrence value - mean(breeding occurrence for the species pair)] / [2 \* standard deviation(breeding occurrence for the species pair)]. Point size in (A) reflects the number of overlapping points (see legend at top right of graph). Sample sizes (allopatry only): Africa,  $N = 328$  points; Asia,  $N = 562$ ; Australia,  $N = 62$ , Europe,  $N = 929$ ; North America,  $N = 1,231$ ; South America,  $N = 323$ . In our analysis, we included cities in New Zealand with Australia, and Central America and the Caribbean with North America.

## A Data

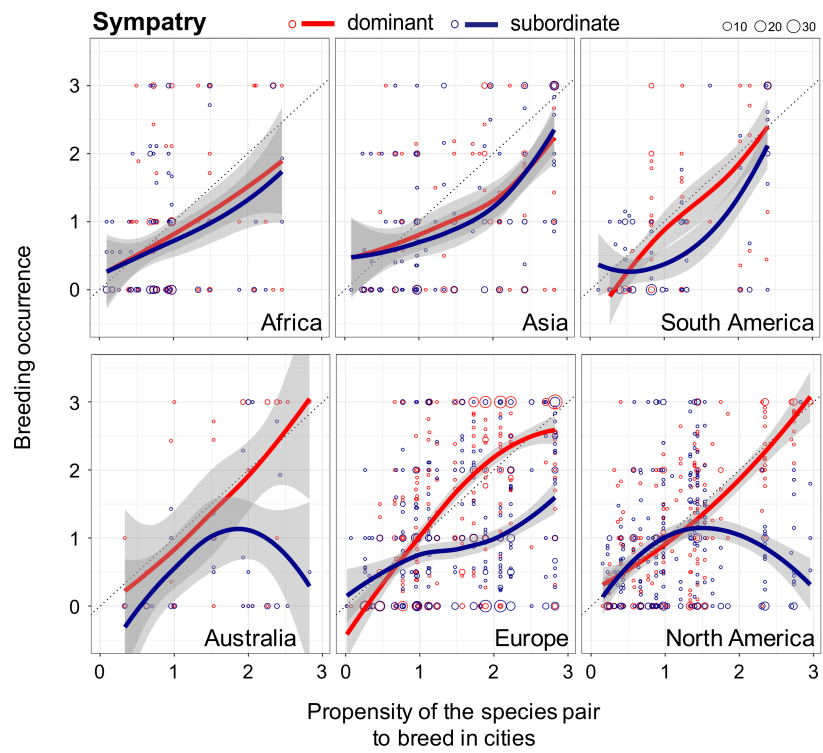

## B Model

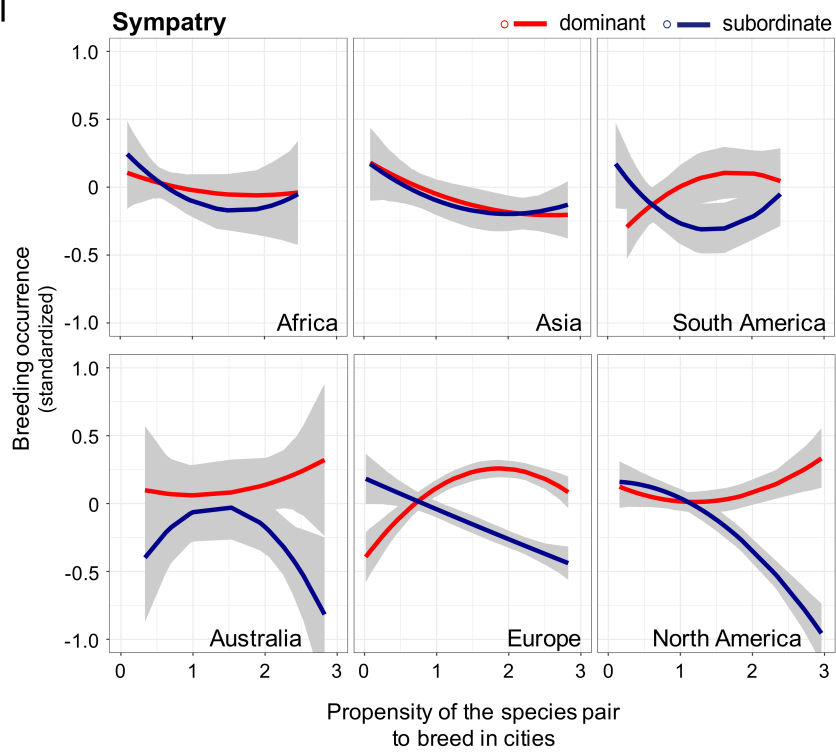

**Fig. S4. Geographic variation in the urban-breeding occurrence of dominant and subordinate bird species in sympatry.** Panels show only cases where dominant and subordinate



species overlapped their breeding ranges (sympatry). See Table S2 for statistical results. See caption of Fig. 2 in the main text for definitions of axes. Solid lines (red = dominant species; blue = subordinate species) are (A) loess splines (span = 1.5) with 95% confidence limits shown in gray, and (B) model predicted values with 95% confidence limits shown in gray from a MCMCglmm analysis. Slopes in (B) are flattened relative to slopes in (A) because statistical models in (B) incorporated standardized breeding occurrence values (y-axes) = [breeding occurrence value - mean(breeding occurrence for the species pair)] / [2 \* standard deviation(breeding occurrence for the species pair)]. Point size in (A) reflects the number of overlapping points (see legend at top right of graph). Sample sizes (sympatry only): Africa,  $N = 218$  points; Asia,  $N = 276$ ; Australia,  $N = 74$ ; Europe,  $N = 874$ ; North America,  $N = 577$ ; South America,  $N = 174$ . In our analysis, we included cities in New Zealand with Australia, and Central America and the Caribbean with North America.

## Urban breeding birds - Toronto

### Urban breeding birds of Toronto, Ontario, Canada

Please indicate which bird species (listed below) **breed every year in urban habitats** within the city limits of **Toronto**. Note that we are only interested in **breeding**; please do not select "yes" if the species only winters, migrates through, or visits, but does not breed, in your city.

Please note that **not all** urban breeding species are listed (only the focal species that we are studying), and many of the species listed may not breed in urban habitats.

"Urban habitats" include urban parks and ponds, and industrial, commercial, residential, and suburban areas, in addition to the downtown core, but **do not** include natural areas within the city (for example, wildlife preserves, conservation areas, or isolated patches of natural habitat).

If species have undergone a major decline recently (for example, Asian vultures, some aerial insectivores), please record the historical breeding status in your city.

All responses are anonymous; however, you are welcome to leave your name in the "Comments" section at the end. Responses are limited to one response per city per device. For more information on this study and links to surveys for other cities, please click [here](#).

[Taxonomy and order follow the [International Ornithological Congress, World Bird List](#) (version 6.2) <http://dx.doi.org/10.14344/IOC.ML.6.2>]

#### 1. Mute Swan, *Cygnus olor*

- |                                                                                                                                             |                                                                                             |
|---------------------------------------------------------------------------------------------------------------------------------------------|---------------------------------------------------------------------------------------------|
| <input type="radio"/> <b>yes</b> - this species is a <b>widespread</b> breeder in urban habitats across the city                            | <input type="radio"/> <b>no</b> - this species does not breed in urban habitats in the city |
| <input type="radio"/> <b>yes</b> - this species is a <b>local</b> breeder in urban habitats in the city, found in only a few locations      | <input type="radio"/> <b>not sure</b>                                                       |
| <input type="radio"/> <b>yes</b> - this species is <b>somewhere in between</b> a local and widespread breeder in urban habitats in the city |                                                                                             |

#### 2. Trumpeter Swan, *Cygnus buccinator*

- |                                                                                                                                             |                                                                                             |
|---------------------------------------------------------------------------------------------------------------------------------------------|---------------------------------------------------------------------------------------------|
| <input type="radio"/> <b>yes</b> - this species is a <b>widespread</b> breeder in urban habitats across the city                            | <input type="radio"/> <b>no</b> - this species does not breed in urban habitats in the city |
| <input type="radio"/> <b>yes</b> - this species is a <b>local</b> breeder in urban habitats in the city, found in only a few locations      | <input type="radio"/> <b>not sure</b>                                                       |
| <input type="radio"/> <b>yes</b> - this species is <b>somewhere in between</b> a local and widespread breeder in urban habitats in the city |                                                                                             |

68. Northern Cardinal, *Cardinalis cardinalis*

- yes** - this species is a **widespread** breeder in urban habitats across the city
- yes** - this species is a **local** breeder in urban habitats in the city, found in only a few locations
- yes** - this species is **somewhere in between** a local and widespread breeder in urban habitats in the city
- no** - this species does not breed in urban habitats in the city
- not sure**

69. Please rate your knowledge of the breeding birds of Toronto from 1 (you know the city's birds a little bit) to 5 (you know the city's birds very well).

|                                          |                       |                                             |                       |                                       |
|------------------------------------------|-----------------------|---------------------------------------------|-----------------------|---------------------------------------|
| 1. I know the city's birds a little bit. | 2.                    | 3. I know the city's birds moderately well. | 4.                    | 5. I know the city's birds very well. |
| <input type="radio"/>                    | <input type="radio"/> | <input type="radio"/>                       | <input type="radio"/> | <input type="radio"/>                 |

70. Please include any additional comments here (optional).  
If you would like to hear about the results of this study, please leave your contact information. Note that the study may take a year or two to complete. Thank you!!

**Fig. S5. An example of one of our surveys (Toronto, Canada).** For brevity, we show only the first and last pages. The intervening pages included other bird species whose breeding ranges overlap Toronto.

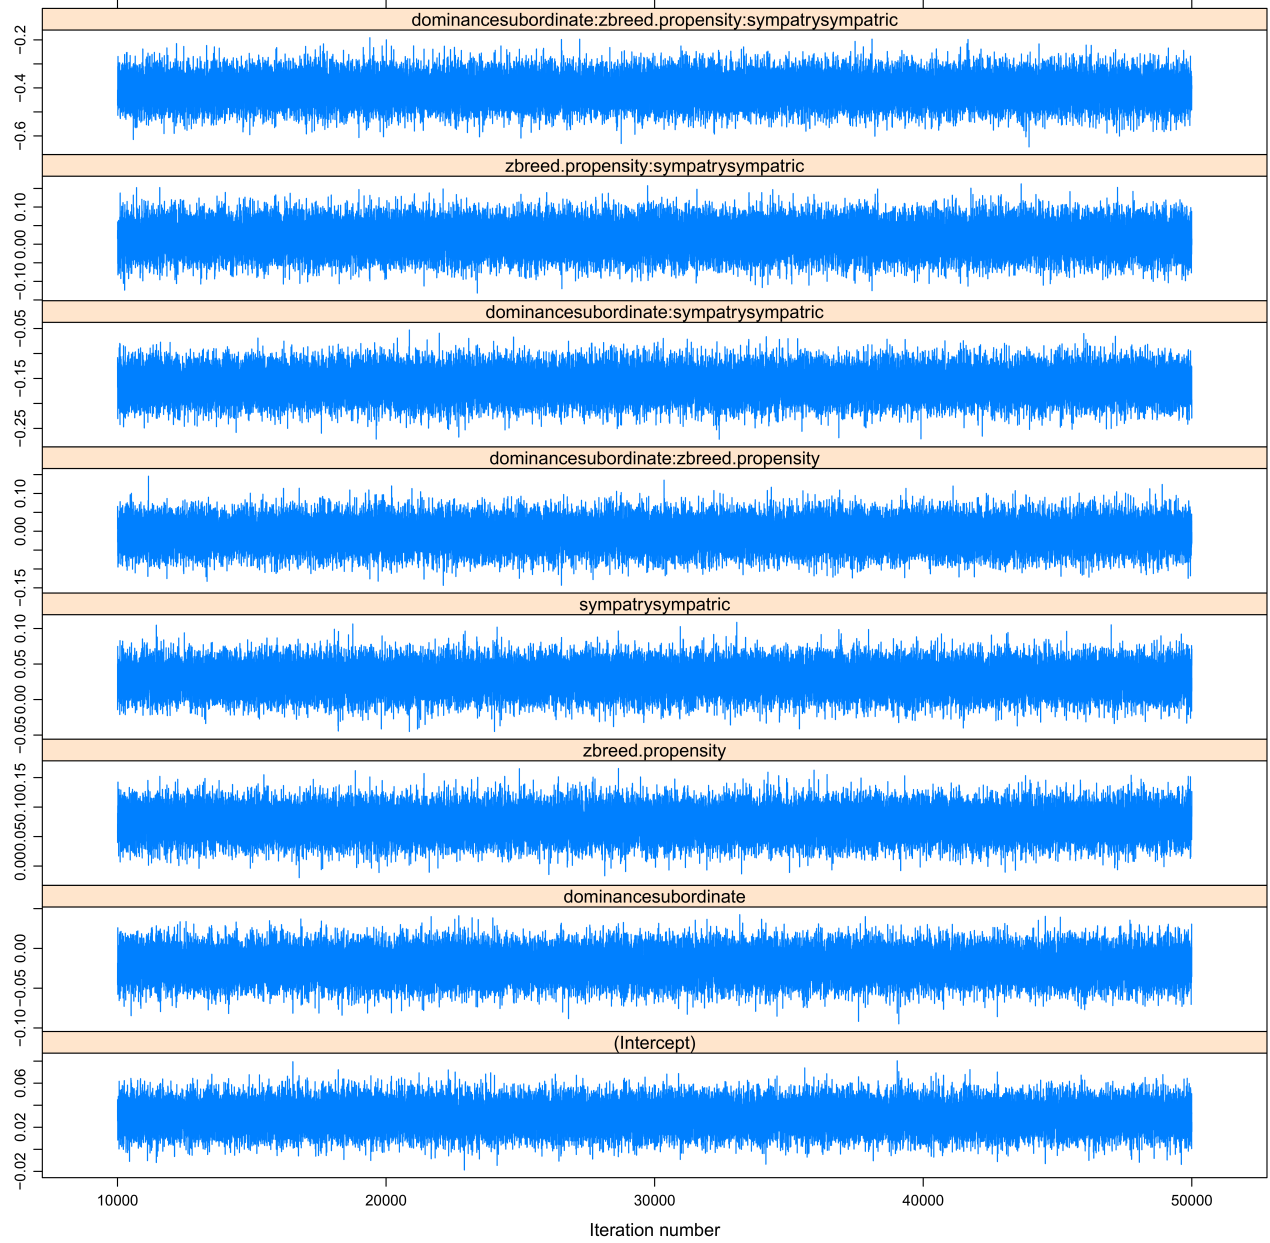

**Fig. S6.** Trace plots for fixed factors in our main MCMCglmm analysis. See Table S6 for additional diagnostics.

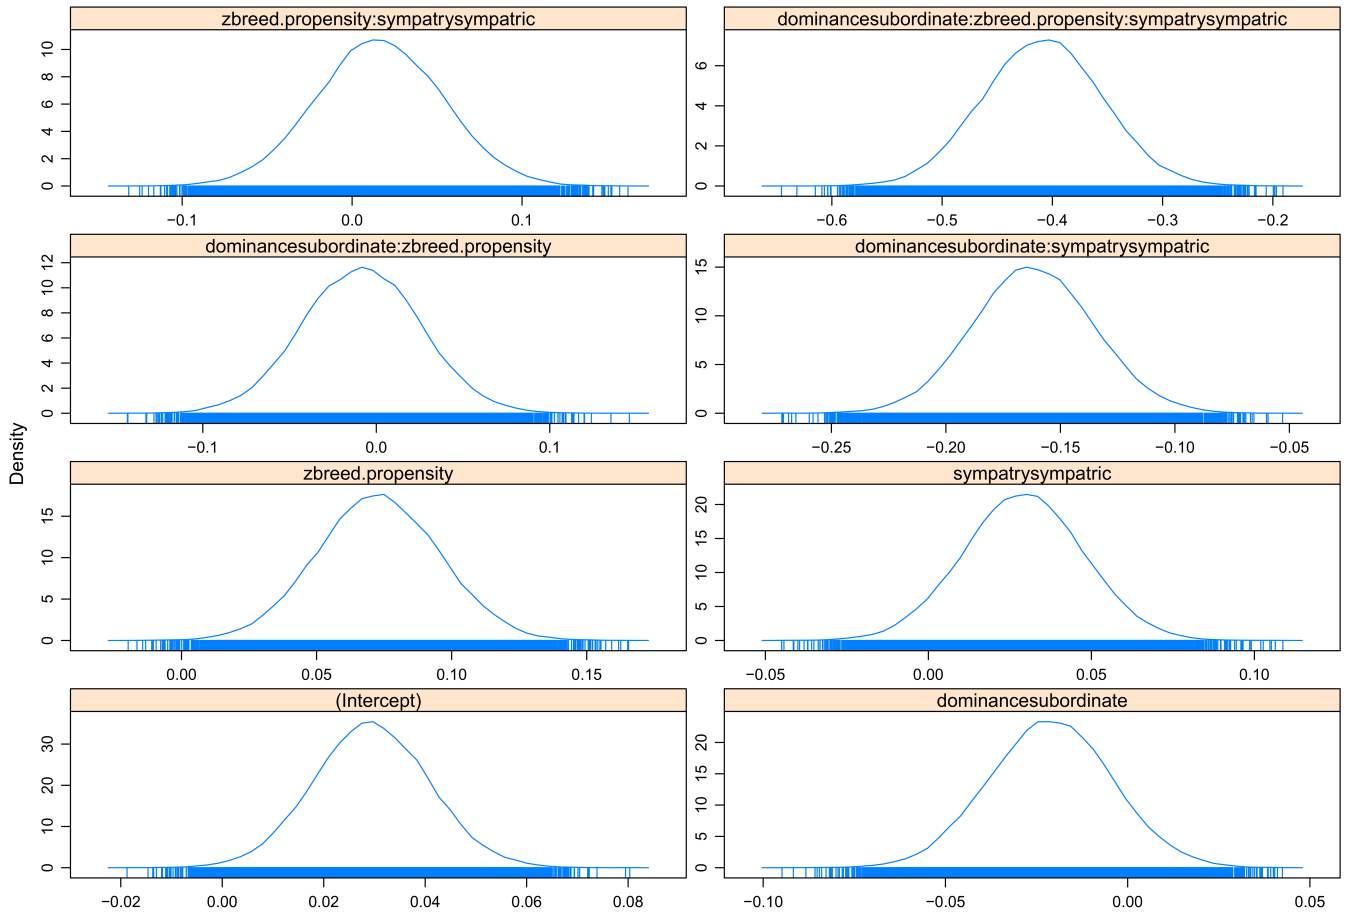

**Fig. S7. Density plots for fixed factors in our main MCMCglmm analysis.** See Table S6 for additional diagnostics.

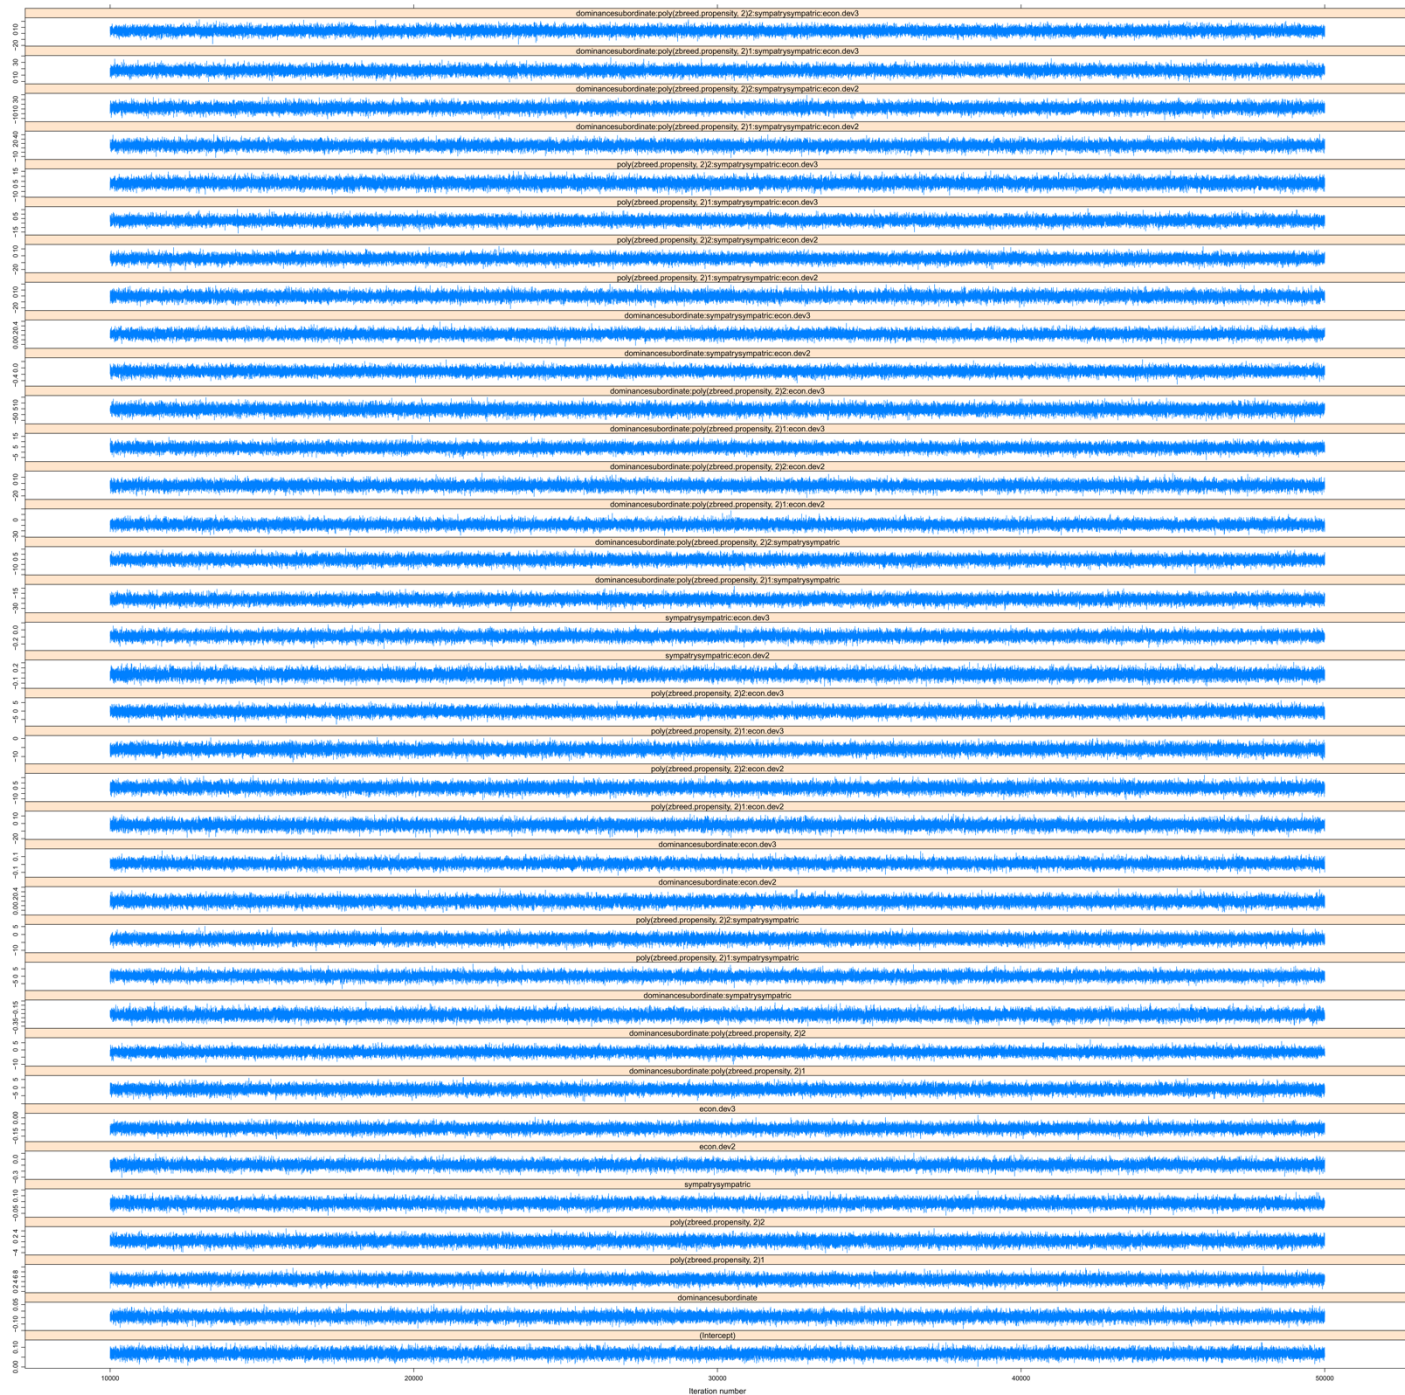

**Fig. S8. Trace plots for fixed factors in our MCMCglmm analysis with economic development. See Table S6 for additional diagnostics.**

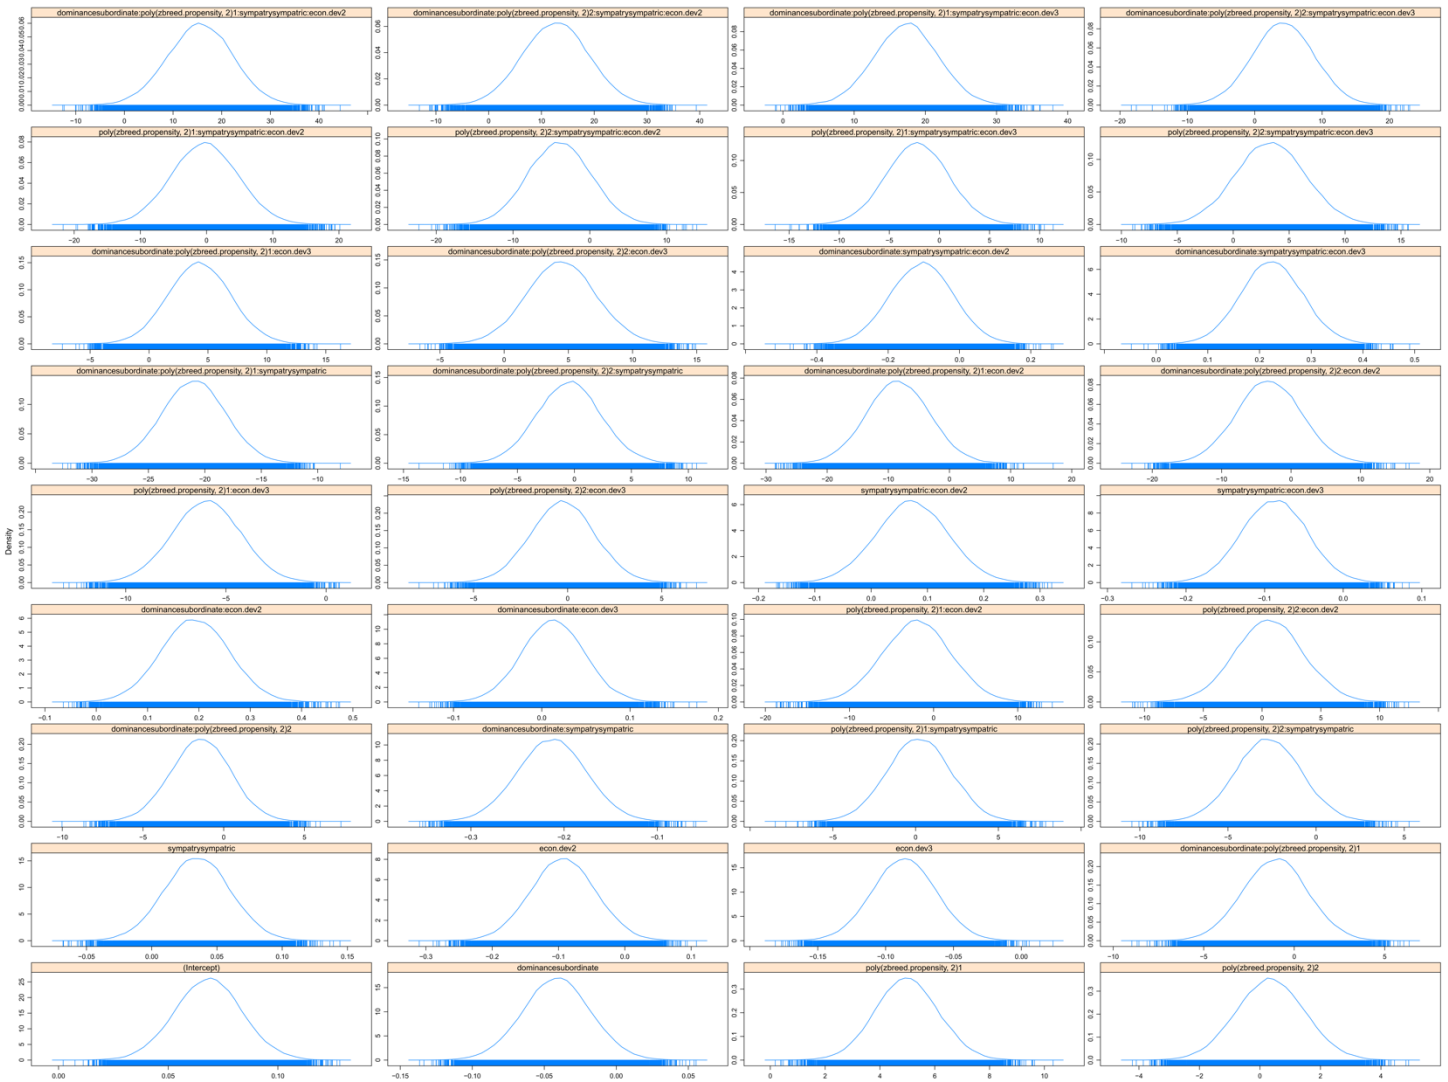

**Fig. S9. Density plots for fixed factors in our MCMCglmm analysis with economic development. See Table S6 for additional diagnostics.**

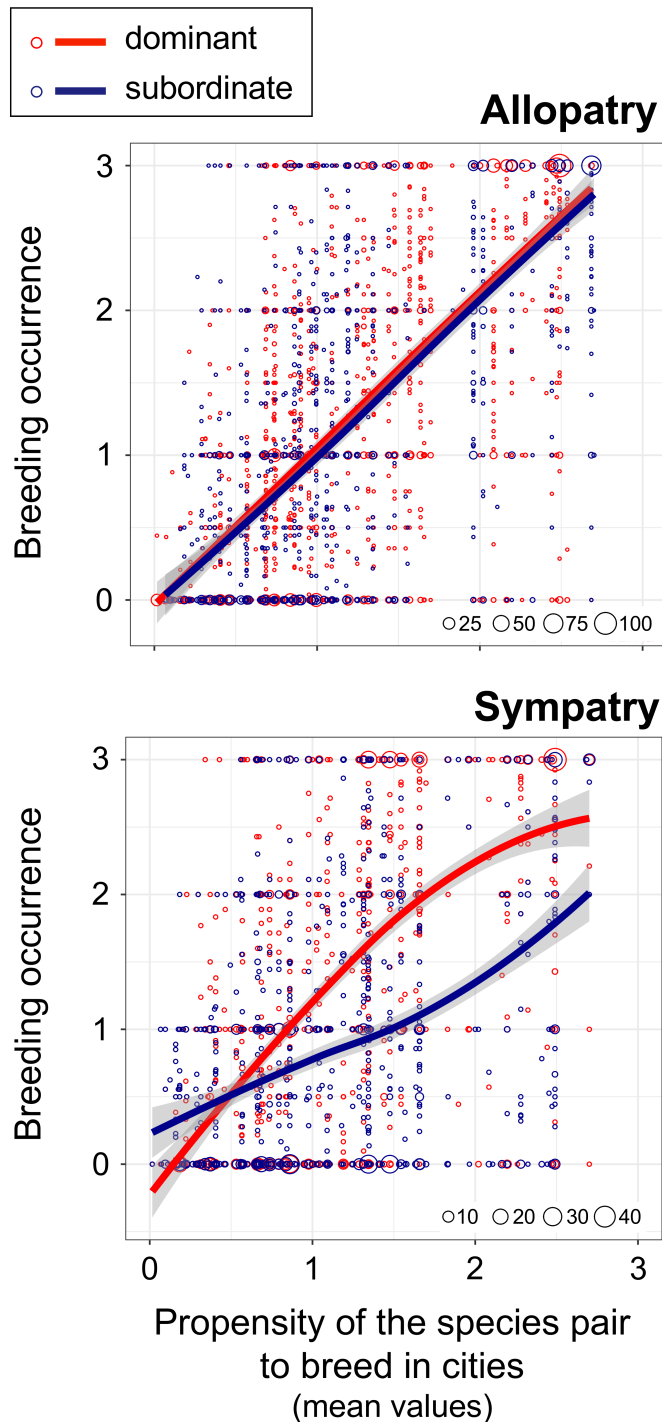

**Fig. S10.** Test of hypotheses for how competitive dominance influences breeding occurrence of birds in cities as a function of the propensity for species pairs to breed in cities, with propensity calculated using mean rather than maximum occurrence values. The effect of dominance depended on both sympatry and the propensity for species pairs to breed in cities (MCMCglmm,  $P_{MCMC} < 0.0001$ ). In allopatry, breeding occurrence values of dominant and subordinate congeners did not differ (MCMCglmm, difference in slopes,  $P_{MCMC} = 0.90$ ). In



sympatry, dominant species were more widespread than subordinate congeners when species pairs had a high propensity to breed in cities (MCMCglmm, difference in slopes,  $P_{MCMC} < 0.0001$ ). Each point in the figures represents the breeding occurrence of one species in one city (allopatry,  $N = 3,425$ ; sympatry,  $N = 2,193$ ); point size reflects the number of overlapping points (see legend at bottom right of graphs). Solid lines (red = dominants; blue = subordinates) are loess splines (span = 1.5) with 95% confidence limits shown in gray. Breeding occurrence values are means for each species in each city (averaged across observers, weighted by observer ability), and range from 0 (absent from urban habitats) to 3 (widespread breeder in urban habitats). The propensity to breed in cities was calculated for each paired dominant and subordinate species (one value for each pair) as the mean (rather than maximum, which was used in the main analyses) breeding occurrence value within a species pair for each city, averaged across all focal cities that overlapped their breeding ranges.

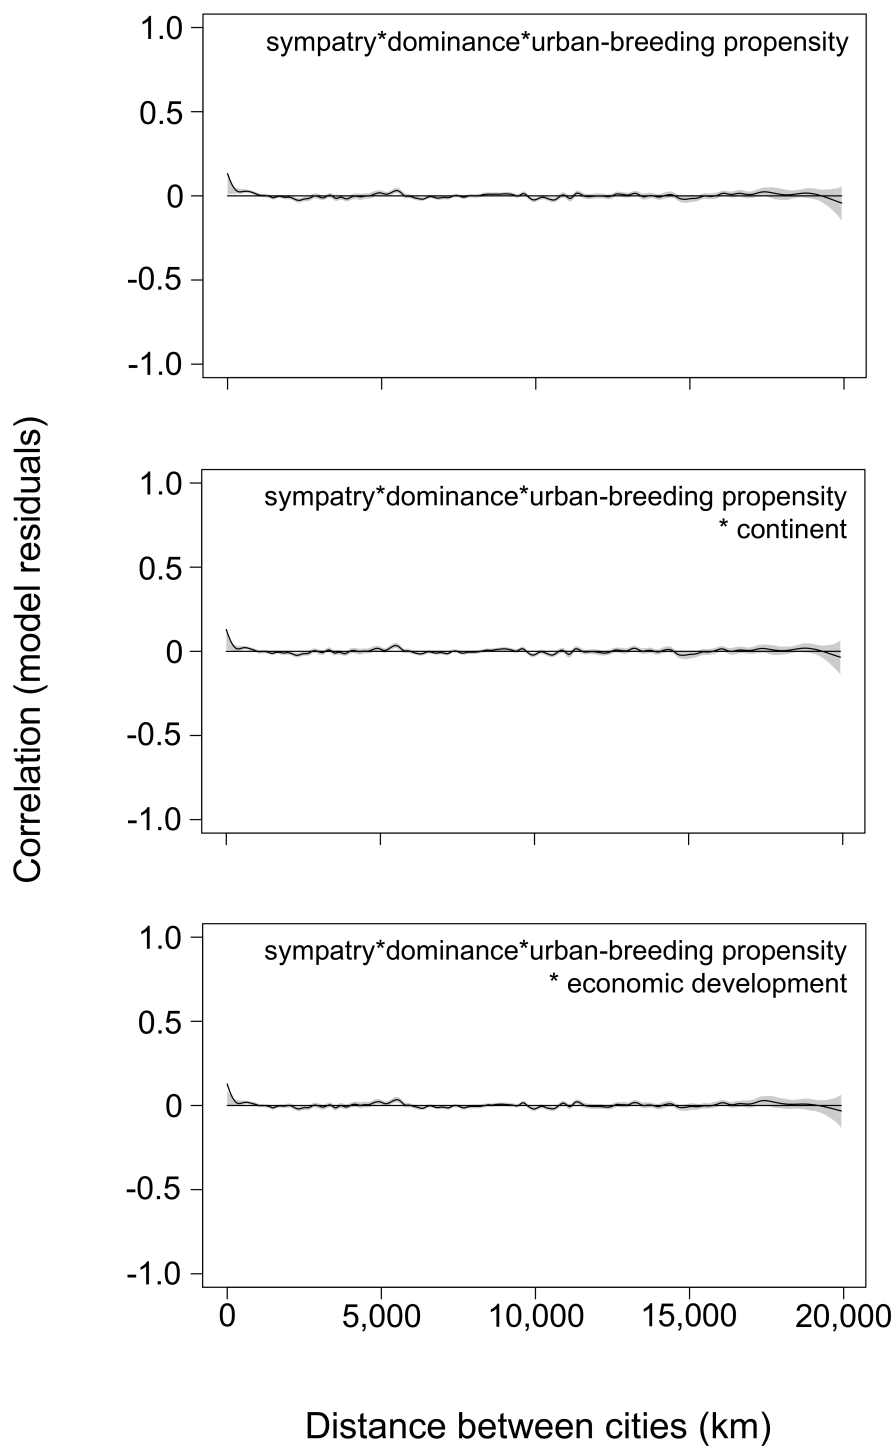

**Fig. S11. Spatial autocorrelation in residuals from our main analyses.** Plots illustrate spatial variation in correlations (95% bootstrap confidence limits in gray) of residuals [(rescaled breeding occurrence values - model predicted values) / (standard deviation of rescaled breeding occurrence values)] for our main model with the three-way interaction of dominance, sympatry, and urban-breeding propensity (top), and the four-way interactions between these terms and continent (middle) or economic development (bottom).

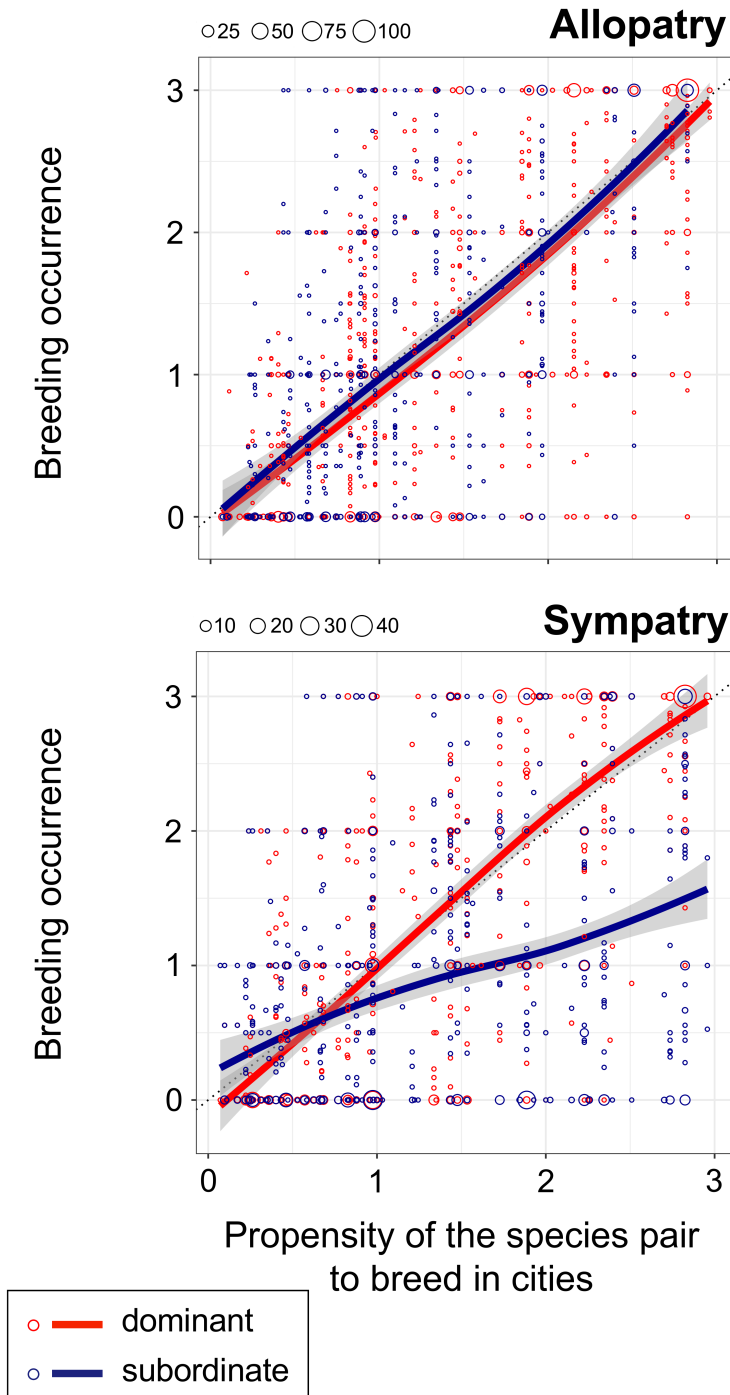

**Fig. S12. Variation in the urban-breeding occurrence of dominant and subordinate bird species as a function of their propensity to breed in cities, restricted to the subset of species pairs for which quantitative data used to determine behavioral dominance were accessible ( $N = 80$  species pairs).** In allopatry, breeding occurrence values of dominant and subordinate congeners did not differ (MCMCglmm, difference in slopes,  $P_{MCMC} = 0.053$ ). In sympatry, dominant species were more widespread than subordinate congeners when species pairs had a high propensity to breed in cities (MCMCglmm, difference in slopes,  $P_{MCMC} < 0.0001$ ). Each

point in the figures represents the breeding occurrence of one species in one city (allopatry,  $N = 1,767$ ; sympatry,  $N = 1,342$ ); point size reflects the number of overlapping points (see legend at top left of graphs). Solid lines (red = dominant species; blue = subordinate species) are loess splines (span = 1.5) with 95% confidence limits shown in gray. Breeding occurrence values are means for each species in each city (averaged across observers, weighted by observer ability), and range from 0 (absent from urban habitats) to 3 (widespread breeder in urban habitats). Propensity to breed in cities was calculated for each paired dominant and subordinate species as the maximum breeding occurrence within a species pair for each city, averaged across all focal cities that overlapped their breeding ranges (one value per species pair; same value for sympatry and allopatry). See *Supplementary Methods and Results* for statistical results.

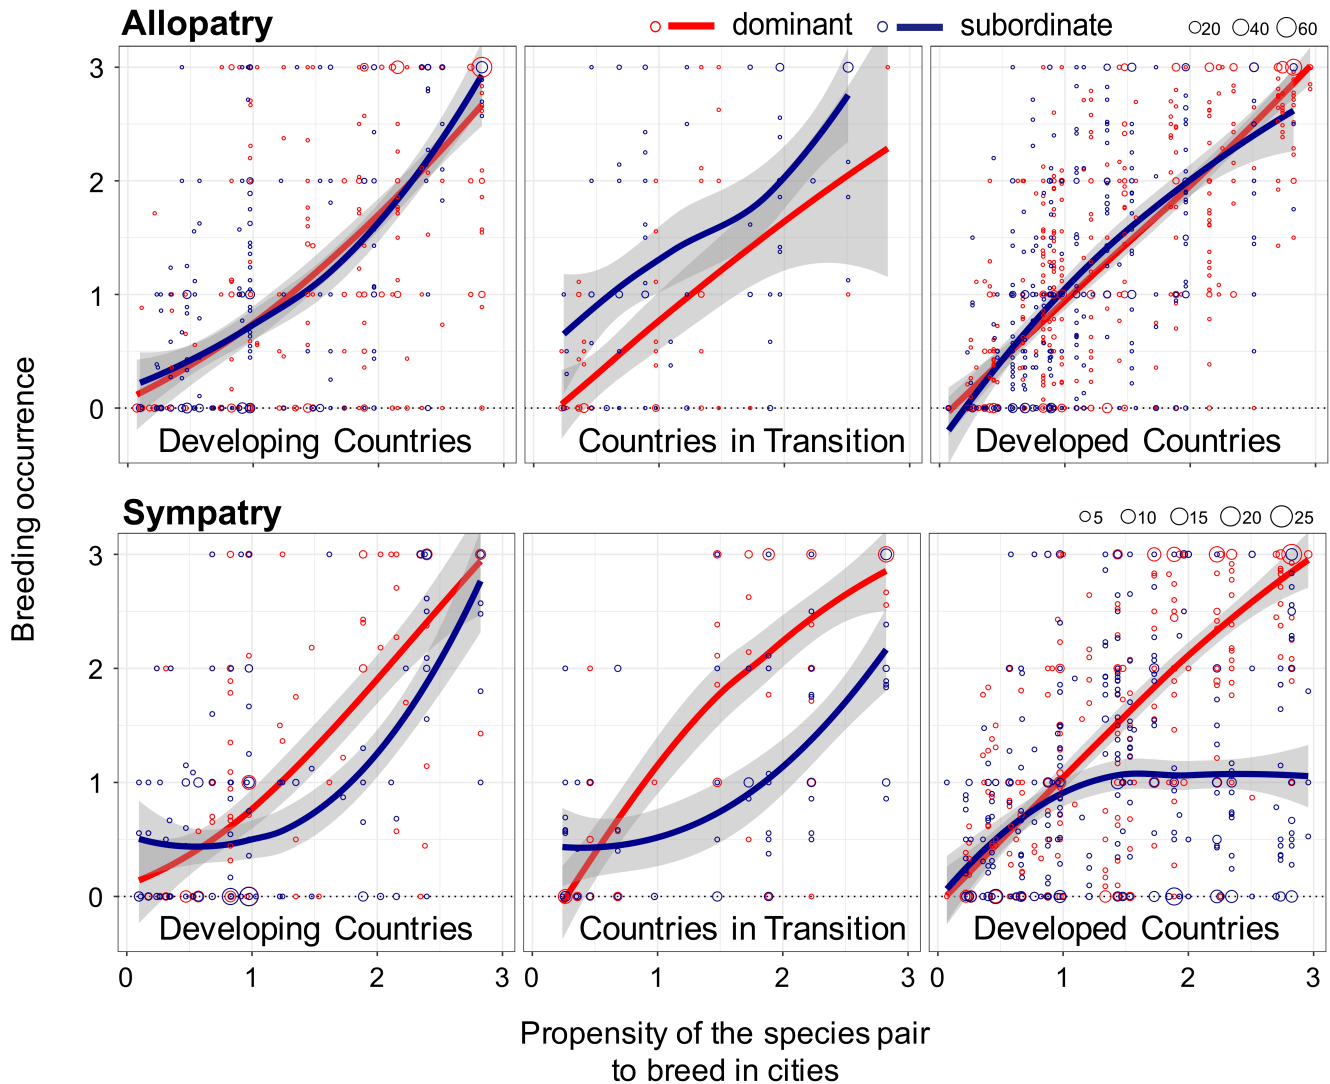

**Fig. S13. Variation in the urban-breeding occurrence of dominant and subordinate bird species across levels of economic development, restricted to the subset of species pairs for which quantitative data on behavioral dominance were accessible ( $N = 80$  species pairs).** Economic development categorization follows country-level designations of the United Nations from 2014. Solid lines (red = dominant species; blue = subordinate species) are loess splines (span = 1.5) with 95% confidence limits shown in gray. Point size reflects the number of overlapping points (see legend at top right of graphs). See caption of Fig. 2 in the main text for definitions of axes. In allopatry, linear slopes for dominant and subordinate species did not differ in developed, in-transition, or developing countries ( $P_{MCMC} > 0.05$ ). In sympatry, linear slopes for dominant and subordinate species differed in developed ( $P_{MCMC} < 0.0001$ ) and in-transition countries ( $P_{MCMC} < 0.0001$ ), but less so in developing countries ( $P_{MCMC} = 0.02$ ). Sample sizes, allopatry: developed  $N = 974$ , in transition  $N = 160$ , developing  $N = 633$ ; sympatry: developed  $N = 821$ , in transition  $N = 182$ , developing  $N = 339$ . See *Supplementary Methods and Results* for statistical results.

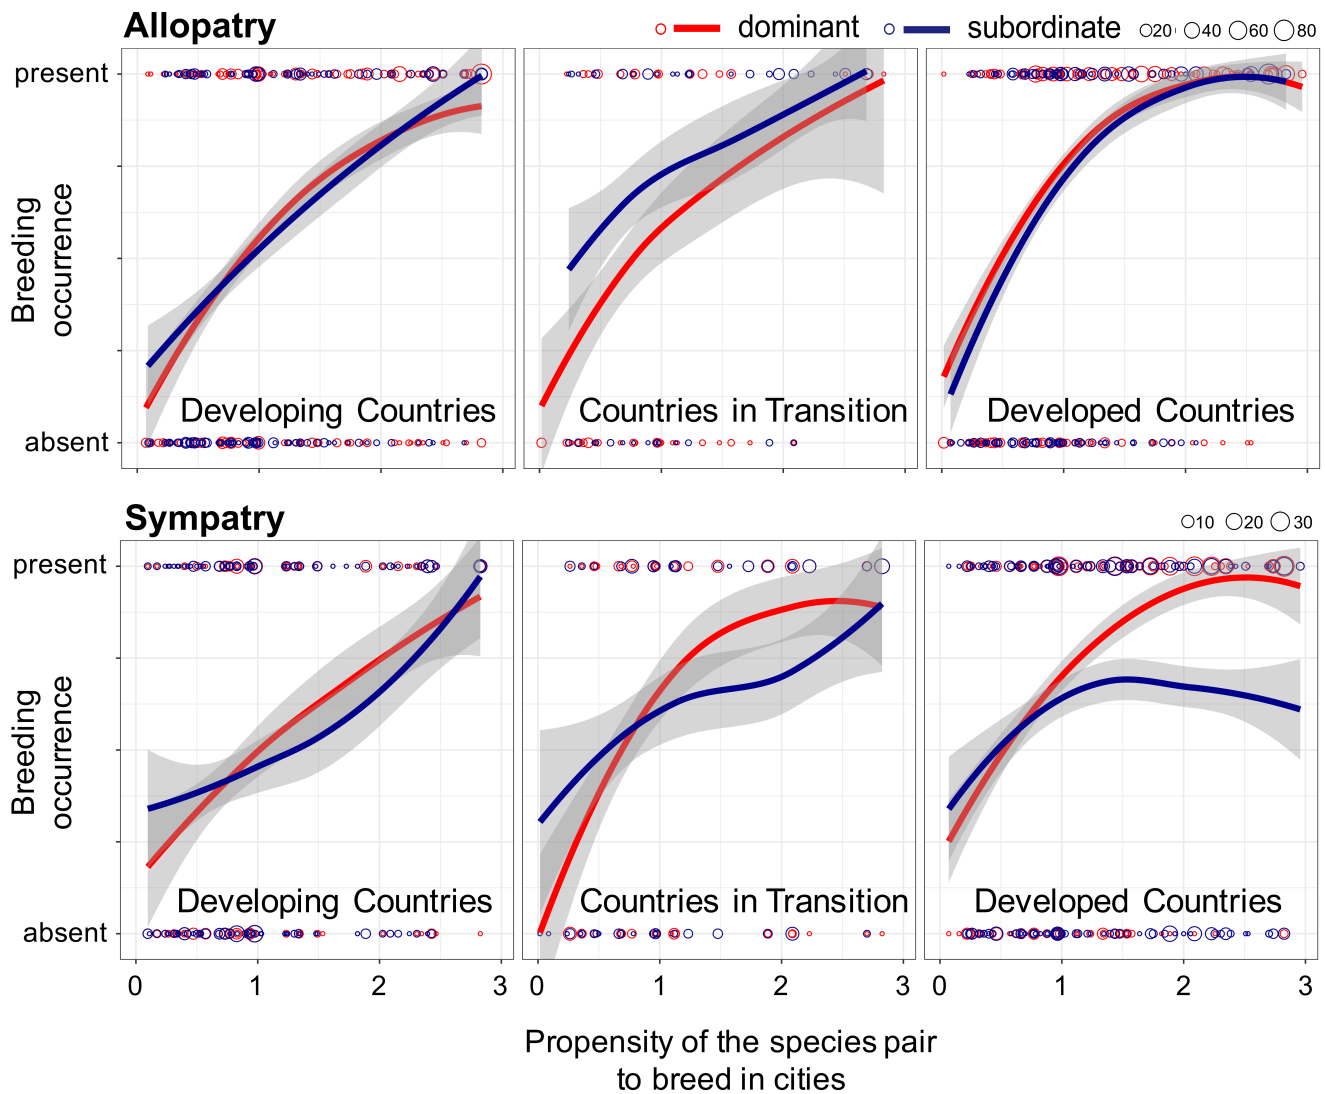

**Fig. S14. Variation in the presence versus absence of urban-breeding dominant and subordinate bird species across levels of economic development.** Economic development categorization follows country-level designations of the United Nations from 2014. Solid lines (red = dominant species; blue = subordinate species) are loess splines (span = 1.5) with 95% confidence limits shown in gray. Point size reflects the number of overlapping points (see legend at top right of graphs). See caption of Fig. 2 in the main text for definitions of axes. In allopatry, linear slopes for dominant and subordinate species did not differ in developed, in-transition, or developing countries (Categorical MCMCglmm, difference in linear slopes,  $P_{MCMC} > 0.10$ ). In sympatry, linear slopes for dominant and subordinate species differed in developed ( $P_{MCMC} < 0.0001$ ) and in-transition countries ( $P_{MCMC} = 0.035$ ), but not developing countries ( $P_{MCMC} = 0.37$ ). Sample sizes, allopatry: developed  $N = 1,803$ , in transition  $N = 303$ , developing  $N = 1,329$ ; sympatry: developed  $N = 1,184$ , in transition  $N = 370$ , developing  $N = 639$ . See *Supplementary Methods and Results* for statistical results.

**Table S1. Results and model performance before and after accounting for phylogeny in our analyses<sup>1</sup>.** We accounted for phylogeny in two ways: (A) incorporating the phylogeny of our focal species into the analysis as a random factor, and (B) including taxonomic order as a fixed factor in a saturated model with dominance, urban-breeding propensity, and sympatry as other predictors.

| <b>(A) Phylogeny as a Random Factor</b>                              | <b>Saturated model</b>                            | <b>3-way interaction<sup>2</sup> removed</b> | <b>3-way interaction<sup>2</sup> contribution</b> |
|----------------------------------------------------------------------|---------------------------------------------------|----------------------------------------------|---------------------------------------------------|
|                                                                      | <b>DIC<sup>3</sup></b>                            | <b>DIC<sup>3</sup></b>                       | <b>Δ DIC<sup>4</sup></b>                          |
| Main effect <sup>5</sup> (phylogeny not included as a random factor) | 7,823.1                                           | 7,878.0                                      | <b>-54.90</b>                                     |
| Main effect <sup>5</sup> (phylogeny included as a random factor)     | 7,817.6                                           | 7,871.8                                      | <b>-54.24</b>                                     |
| <b>(B) Taxonomic Order as a Fixed Factor</b>                         | <b>Saturated model<br/>(with taxonomic order)</b> | <b>4-way interaction<sup>6</sup> removed</b> | <b>4-way interaction<sup>6</sup> contribution</b> |
|                                                                      | <b>DIC<sup>3</sup></b>                            | <b>DIC<sup>3</sup></b>                       | <b>Δ DIC<sup>4</sup></b>                          |
| Taxonomic order (all orders included)                                | 7,802.4                                           | 7,795.2                                      | +7.24                                             |
| Taxonomic order (orders with <3 species pairs removed)               | 7,207.0                                           | 7,200.2                                      | +6.73                                             |

<sup>1</sup> response variable = breeding occurrence value for each species in each city = average across observers, weighted by the observer's self-reported ability ( $N = 5,618$ ); random factor = phylogenetically-independent species pair

<sup>2</sup> 3-way interaction term = dominance : urban-breeding propensity : sympatry

<sup>3</sup> DIC = Deviance Information Criterion; lower values denote better model performance

<sup>4</sup> negative values denote an improvement on the model

<sup>5</sup> main effect: the effect of dominance depended on urban-breeding propensity and sympatry (3-way interaction term)

<sup>6</sup> 4-way interaction term = dominance : urban-breeding propensity : sympatry : taxonomic order

**Table S2. Results and model performance after accounting for geographic variation across continents<sup>1</sup>.** We accounted for geographic variation by including continent as a fixed factor in a saturated model with dominance, urban-breeding propensity, and sympatry as other predictors. (A) Model performance when continent was included as an interaction term with our main effects (saturated model), and when the 4-way interaction term was removed. (B) Estimates (slopes for subordinate species relative to dominants) and  $P_{MCMC}$  values for tests of the difference in slopes between dominant and subordinate species in allopatry (Fig. S3) and sympatry (Fig. S4) for each continent.

| (A) Continent as a Fixed Factor <sup>2</sup>                | Saturated model       | 4-way interaction <sup>3</sup> | 4-way interaction <sup>3</sup> |                       |                          |            |
|-------------------------------------------------------------|-----------------------|--------------------------------|--------------------------------|-----------------------|--------------------------|------------|
|                                                             | (with continent)      | removed                        | contribution                   |                       |                          |            |
|                                                             | DIC <sup>4</sup>      | DIC <sup>4</sup>               | $\Delta$ DIC <sup>5</sup>      |                       |                          |            |
| Continent                                                   | 7,755.5               | 7,775.5                        | -20.02                         |                       |                          |            |
| (B) Model Results with Continent Included (Saturated Model) | Linear component      |                                |                                | Quadratic component   |                          |            |
|                                                             | Estimate <sup>6</sup> | 95% confidence intervals       | $P_{MCMC}$                     | Estimate <sup>6</sup> | 95% confidence intervals | $P_{MCMC}$ |
| <b>Allopatry</b>                                            |                       |                                |                                |                       |                          |            |
| Africa                                                      | 9.72                  | +1.96, +17.43                  | 0.013                          | 5.05                  | -3.39, +13.62            | 0.25       |
| Asia                                                        | 3.95                  | -2.15, +9.93                   | 0.20                           | 3.69                  | -2.30, +9.64             | 0.23       |
| Australia                                                   | -1.16                 | -19.67, +18.60                 | 0.90                           | -9.29                 | -34.02, +15.75           | 0.47       |
| Europe                                                      | -3.83                 | -8.79, +1.12                   | 0.13                           | -0.70                 | -5.40, +4.05             | 0.77       |
| North America                                               | 1.61                  | -3.09, +6.26                   | 0.49                           | -1.59                 | -6.35, +3.32             | 0.52       |
| South America                                               | -10.58                | -21.94, +0.81                  | 0.07                           | -6.51                 | -15.86, +3.04            | 0.18       |



**Sympatry**

|               |        |                |          |        |               |        |
|---------------|--------|----------------|----------|--------|---------------|--------|
| Africa        | 0.18   | -17.81, +18.39 | 0.98     | 5.26   | -7.82, +17.78 | 0.42   |
| Asia          | 2.22   | -5.65, +10.27  | 0.58     | 1.67   | -6.44, +9.74  | 0.69   |
| Australia     | -13.33 | -31.95, +5.90  | 0.17     | -18.96 | -41.55, +2.91 | 0.096  |
| Europe        | -20.28 | -25.16, -15.25 | < 0.0001 | 8.20   | +3.35, +12.91 | 0.0009 |
| North America | -27.50 | -33.91, -20.74 | < 0.0001 | -9.90  | -15.73, -4.03 | 0.0011 |
| South America | -0.96  | -14.63, +12.86 | 0.89     | 19.34  | +3.50, +34.36 | 0.015  |

---

<sup>1</sup> response variable = breeding occurrence value for each species in each city = average across observers, weighted by the observer's self-reported ability ( $N = 5,618$ ); random factor = phylogenetically-independent species pair

<sup>2</sup> main effect: the effect of dominance depended on urban-breeding propensity and sympatry (3-way interaction term)

<sup>3</sup> 4-way interaction term = dominance : urban-breeding propensity : sympatry : continent

<sup>4</sup> DIC = Deviance Information Criterion; lower values denote better model performance

<sup>5</sup> negative values denote an improvement on the model

<sup>6</sup> estimate describes the slope of the subordinate relative to the dominant, where  $x$ =urban-breeding propensity and  $y$ =breeding occurrence

**Table S3. Comparisons of model performance for candidate factors to explain geographic variation in our main result<sup>1</sup>.** Each candidate factor was included as a predictor variable in saturated models with dominance, urban-breeding propensity, and sympatry. The influence of candidate factors on our main result was assessed by comparing saturated models with the candidate factor to the saturated model with continent identity, as well as by dropping the 4-way interaction and comparing the saturated model with the model with the 4-way interaction removed. We used the Deviance Information Criterion values (DIC) to assess model performance for all comparisons. We also assessed the influence of candidate factors in models by dropping them completely from the model, and comparing DIC between the saturated model and the model with the candidate factor removed.

| Candidate Factor <sup>2</sup>                            | Saturated model  | 4-way            | 4-way                     | Candidate factor          |
|----------------------------------------------------------|------------------|------------------|---------------------------|---------------------------|
|                                                          | (with factor)    | interaction      | interaction               | contribution <sup>3</sup> |
|                                                          | DIC <sup>4</sup> | DIC <sup>4</sup> | $\Delta$ DIC <sup>5</sup> | $\Delta$ DIC <sup>5</sup> |
| <b>Continent</b>                                         | <b>7,755.5</b>   | <b>7,775.5</b>   | <b>-20.0</b>              | <b>-67.5</b>              |
| Continent (with full phylogeny added as a random effect) | 7,748.5          | 7,768.4          | -19.9                     | -74.5                     |
| <b>Economic development (country)</b>                    | <b>7,731.2</b>   | <b>7,743.1</b>   | <b>-11.9</b>              | <b>-91.8</b>              |
| Continent peripheral to where dominance data collected?  | 7,767.1          | 7,765.7          | +1.5                      | -55.9                     |
| Average annual temperature (degrees C) (city)            | 7,770.5          | 7,775.0          | -4.5                      | -52.5                     |
| Absolute latitude (decimal degrees) (city)               | 7,772.8          | 7,775.2          | -2.4                      | -50.2                     |
| Number of species (city)                                 | 7,788.2          | 7,792.4          | -4.2                      | -34.8                     |
| Taxonomic order                                          | 7,802.1          | 7,795.2          | +6.9                      | -20.9                     |
| Net primary productivity (g/m <sup>2</sup> /year) (city) | 7,810.4          | 7,811.3          | -0.9                      | -12.6                     |
| Number of sympatric, urban-adapted species (city)        | 7,814.0          | 7,812.3          | +1.7                      | -9.0                      |
| Number of observers (city)                               | 7,814.1          | 7,812.8          | +1.3                      | -8.9                      |
| Continent peripheral to species range centroid?          | 7,826.4          | 7,825.3          | +1.0                      | +3.4                      |
| Human population size (city)                             | 7,827.3          | 7,828.3          | -1.1                      | +4.2                      |
| Average ability of observers (city)                      | 7,829.9          | 7,830.6          | -0.7                      | +6.9                      |

<sup>1</sup> response variable = breeding occurrence value for each species in each city = average across observers, weighted by the observer's self-reported ability ( $N = 5,618$ ); random factor = phylogenetically-independent species pair

<sup>2</sup> see Methods for definitions and sources of data for candidate factors

<sup>3</sup> DIC for the models with only dominance, propensity to breed in urban habitats, and sympatry was 7,823

<sup>4</sup> DIC = Deviance Information Criterion; lower values denote better model performance

<sup>5</sup> negative values denote an improvement to the model

**Table S4. Results and model performance after accounting for a country's level of economic development<sup>1</sup>.** Economic development categorization follows country-level designations of the United Nations from 2014. We included economic development as a fixed factor in a saturated model with dominance, urban-breeding propensity, and sympatry as other predictors. Table provides estimates and  $P_{MCMC}$  values for tests of the difference in slopes between dominant and subordinate species in allopatry and sympatry (Fig. 3).

| Economic Development <sup>2</sup> | Linear component      |                          |            | Quadratic component   |                          |            |
|-----------------------------------|-----------------------|--------------------------|------------|-----------------------|--------------------------|------------|
|                                   | Estimate <sup>3</sup> | 95% confidence intervals | $P_{MCMC}$ | Estimate <sup>3</sup> | 95% confidence intervals | $P_{MCMC}$ |
| <b>Allopatry</b>                  |                       |                          |            |                       |                          |            |
| Developed                         | -1.04                 | -4.62, +2.45             | 0.56       | -1.43                 | -5.06, +2.19             | 0.44       |
| In transition                     | -9.42                 | -18.89, -0.002           | 0.051      | -4.58                 | -13.17, +4.00            | 0.30       |
| Developing                        | 3.23                  | -0.64, +7.12             | 0.10       | 3.05                  | -0.90, +6.93             | 0.13       |
| <b>Sympatry</b>                   |                       |                          |            |                       |                          |            |
| Developed                         | -22.01                | -26.19, -17.61           | < 0.0001   | -1.88                 | -5.99, +2.26             | 0.37       |
| In transition                     | -14.78                | -22.00, -7.63            | < 0.0001   | 7.63                  | +0.53, +14.48            | 0.034      |
| Developing                        | -0.40                 | -6.18, +5.47             | 0.89       | 6.79                  | +0.79, +12.75            | 0.026      |

<sup>1</sup> response variable = breeding occurrence value for each species in each city = average across observers, weighted by the observer's self-reported ability ( $N = 5,618$ ); random factor = phylogenetically-independent species pair

<sup>2</sup> economically developed countries, countries in transition between developing and developed economies, and economically developing countries

<sup>3</sup> estimate describes the slope of the subordinate relative to the dominant, where  $x$ =urban-breeding propensity and  $y$ =breeding occurrence

**Table S5. Comparisons of model performance for our main model (A), and for candidate factors to explain geographic variation in our main result (B), using a generalized least squares approach that incorporates spatial autocorrelation<sup>1</sup>.** (A) We tested if the effects of dominance on breeding occurrence varied as a function of urban-breeding propensity and sympatry by dropping the 3-way interaction from the model and comparing model performance using Akaike Information Criterion values (AIC). (B) Each candidate factor was included as a predictor variable in saturated models with dominance, urban-breeding propensity, and sympatry. The influence of candidate factors on our main result was assessed by dropping the 4-way interaction and comparing AIC values between the saturated model and the model with the 4-way interaction removed. We also assessed the influence of candidate factors by dropping them completely from the model, and comparing AIC values between the saturated model and the model with the candidate factor removed. The model with economic development (bold) was the only factor that improved model fit in an interaction with the main effects.

| <b>(A) Main Analysis</b>                                 | <b>Saturated model</b>                   | <b>3-way<br/>interaction<br/>removed</b> | <b>3-way<br/>interaction<br/>contribution</b> |                                                          |
|----------------------------------------------------------|------------------------------------------|------------------------------------------|-----------------------------------------------|----------------------------------------------------------|
|                                                          | <b>AIC<sup>2</sup></b>                   | <b>AIC<sup>2</sup></b>                   | <b>Δ AIC<sup>3</sup></b>                      |                                                          |
| Model (dominance * sympatry * urban-breeding propensity) | 7,061.3                                  | 7,073.8                                  | -12.5                                         |                                                          |
| <b>(B) Test of Candidate Factors<sup>4</sup></b>         | <b>Saturated model<br/>(with factor)</b> | <b>4-way<br/>interaction<br/>removed</b> | <b>4-way<br/>interaction<br/>contribution</b> | <b>Candidate<br/>factor<br/>contribution<sup>5</sup></b> |
|                                                          | <b>AIC<sup>2</sup></b>                   | <b>AIC<sup>2</sup></b>                   | <b>Δ AIC<sup>3</sup></b>                      | <b>Δ AIC<sup>3</sup></b>                                 |
| Generalised least squares analysis                       |                                          |                                          |                                               |                                                          |
| <b>Continent</b>                                         | <b>7,102.0</b>                           | <b>7,101.6</b>                           | <b>+0.4</b>                                   | <b>+40.7</b>                                             |
| <b>Economic development (country)</b>                    | <b>7,009.5</b>                           | <b>7,012.4</b>                           | <b>-2.9</b>                                   | <b>-51.8</b>                                             |
| Continent peripheral to where dominance data collected?  | 7,064.7                                  | 7,051.5                                  | +13.2                                         | +3.4                                                     |
| Average annual temperature (degrees C) (city)            | 7,055.0                                  | 7,042.7                                  | +12.3                                         | -6.3                                                     |

|                                                   |         |         |       |        |
|---------------------------------------------------|---------|---------|-------|--------|
| Absolute latitude (decimal degrees) (city)        | 7,053.5 | 7,050.9 | +2.6  | -7.8   |
| Number of species (city)                          | 7,053.7 | 7,044.2 | +9.5  | -7.6   |
| Taxonomic order <sup>6</sup>                      | na      | na      | na    | na     |
| Net primary productivity (g/m/year) (city)        | 7,068.1 | 7,057.9 | +10.2 | +6.8   |
| Number of sympatric, urban-adapted species (city) | 7,070.4 | 7,057.6 | +12.8 | +9.1   |
| Number of observers (city)                        | 6,935.4 | 6,928.6 | +6.8  | -125.9 |
| Continent peripheral to species range centroid?   | 7,084.8 | 7,072.0 | +12.8 | +23.5  |
| Human population size (city)                      | 7,066.9 | 7,055.2 | +11.7 | +5.6   |
| Average ability of observers (city)               | 7,068.3 | 7,059.0 | +9.3  | +7.0   |

---

<sup>1</sup> response variable = breeding occurrence value for each species in each city = average across observers, weighted by the observer's self-reported ability ( $N = 5,618$ )

<sup>2</sup> AIC = Akaike Information Criterion; lower values denote better model performance

<sup>3</sup> negative values denote an improvement to the model

<sup>4</sup> see Methods for definitions and sources of data for candidate factors

<sup>5</sup> AIC for the models with only dominance, propensity to breed in urban habitats, and sympatry was 7,061

<sup>6</sup> models with taxonomic order resulted in singularities and could not be run

**Table S6. Diagnostic values for assessing model fit for our main MCMCglmm analyses.** Values for (A) our main model with fixed factors dominance\*sympatry\*urban-breeding propensity, and (B) our model with economic development (i.e., dominance\*sympatry\*urban-breeding propensity\*economic development).

| Factor                                               | Upper confidence interval<br>for Gelman and Rubin's<br>Convergence Diagnostic | Effective<br>sample<br>size | Geweke's<br>Convergence<br>Diagnostic |
|------------------------------------------------------|-------------------------------------------------------------------------------|-----------------------------|---------------------------------------|
| <b>(A) Main analysis</b>                             |                                                                               |                             |                                       |
| Intercept (dominant, allopatric)                     | 1                                                                             | 36,782                      | 1.03                                  |
| Dominance (subordinate)                              | 1                                                                             | 40,000                      | 0.22                                  |
| Sympatry (sympatric)                                 | 1                                                                             | 38,824                      | -0.42                                 |
| Urban-breeding propensity                            | 1                                                                             | 40,000                      | 0.81                                  |
| Dominance : sympatry                                 | 1                                                                             | 40,000                      | -1.01                                 |
| Dominance : urban-breeding propensity                | 1                                                                             | 40,000                      | 0.65                                  |
| Sympatry : urban-breeding propensity                 | 1                                                                             | 40,000                      | -1.12                                 |
| Dominance: sympatry : urban-breeding propensity      | 1                                                                             | 40,624                      | 0.04                                  |
| Multivariate potential scale reduction factor        | 1                                                                             | na                          | na                                    |
| Species pair (random)                                | na                                                                            | 1,818                       | na                                    |
| Units (random)                                       | na                                                                            | 40,000                      | na                                    |
| <b>(B) Economic development analysis<sup>1</sup></b> |                                                                               |                             |                                       |
| Intercept (dominant, allopatric, developed)          | 1                                                                             | 40,000                      | 0.87                                  |
| Dominance (subordinate)                              | 1                                                                             | 40,000                      | 0.08                                  |
| Sympatry (sympatric)                                 | 1                                                                             | 40,000                      | -0.73                                 |
| Economic development (in transition)                 | 1                                                                             | 40,000                      | -1.30                                 |
| Economic development (developing)                    | 1                                                                             | 40,000                      | -0.58                                 |

|                                                                                          |   |        |       |
|------------------------------------------------------------------------------------------|---|--------|-------|
| Urban-breeding propensity (linear)                                                       | 1 | 38,890 | 0.09  |
| Urban-breeding propensity (quadratic)                                                    | 1 | 40,000 | -0.27 |
| Dominance : sympatry                                                                     | 1 | 40,000 | 0.45  |
| Dominance : economic development (in transition)                                         | 1 | 40,000 | 0.13  |
| Dominance : economic development (developing)                                            | 1 | 40,000 | 0.33  |
| Dominance : urban-breeding propensity (linear)                                           | 1 | 40,000 | -0.57 |
| Dominance : urban-breeding propensity (quadratic)                                        | 1 | 40,000 | -0.60 |
| Sympatry : economic development (in transition)                                          | 1 | 40,000 | 0.48  |
| Sympatry : economic development (developing)                                             | 1 | 40,000 | 0.42  |
| Sympatry : urban-breeding propensity (linear)                                            | 1 | 40,000 | 1.35  |
| Sympatry : urban-breeding propensity (quadratic)                                         | 1 | 40,000 | 0.19  |
| Economic development (in transition) : urban-breeding propensity (linear)                | 1 | 39,427 | 1.77  |
| Economic development (in transition) : urban-breeding propensity (quadratic)             | 1 | 40,903 | 2.79  |
| Economic development (developing) : urban-breeding propensity (linear)                   | 1 | 40,000 | -1.65 |
| Economic development (developing) : urban-breeding propensity (quadratic)                | 1 | 39,344 | 1.17  |
| Dominance : sympatry : urban-breeding propensity (linear)                                | 1 | 40,000 | 0.33  |
| Dominance : sympatry : urban-breeding propensity (quadratic)                             | 1 | 42,209 | 1.57  |
| Dominance : economic development (in transition) : urban-breeding propensity (linear)    | 1 | 38,879 | -0.53 |
| Dominance : economic development (in transition) : urban-breeding propensity (quadratic) | 1 | 40,631 | -2.54 |
| Dominance : economic development (developing) : urban-breeding propensity (linear)       | 1 | 40,000 | 2.09  |
| Dominance : economic development (developing) : urban-breeding propensity (quadratic)    | 1 | 40,000 | -0.46 |
| Dominance : sympatry : economic development (in transition)                              | 1 | 40,000 | 0.56  |



|                                                                                                     |    |        |       |
|-----------------------------------------------------------------------------------------------------|----|--------|-------|
| Dominance : sympatry : economic development (developing)                                            | 1  | 40,000 | -0.46 |
| Sympatry : economic development (in transition) : urban-breeding propensity (linear)                | 1  | 40,000 | -1.05 |
| Sympatry : economic development (in transition) : urban-breeding propensity (quadratic)             | 1  | 40,000 | -2.35 |
| Sympatry : economic development (developing) : urban-breeding propensity (linear)                   | 1  | 40,000 | 0.48  |
| Sympatry : economic development (developing) : urban-breeding propensity (quadratic)                | 1  | 41,348 | -0.29 |
| Dominance : sympatry : economic development (in transition) : urban-breeding propensity (linear)    | 1  | 38,048 | -0.32 |
| Dominance : sympatry : economic development (in transition) : urban-breeding propensity (quadratic) | 1  | 41,190 | 1.67  |
| Dominance : sympatry : economic development (developing) : urban-breeding propensity (linear)       | 1  | 40,000 | -1.68 |
| Dominance : sympatry : economic development (developing) : urban-breeding propensity (quadratic)    | 1  | 40,000 | -0.75 |
| Multivariate potential scale reduction factor                                                       | 1  | na     | na    |
| Species pair (random)                                                                               | na | 1,705  | na    |
| Units (random)                                                                                      | na | 39,331 | na    |

---

<sup>1</sup> includes orthogonal polynomial for urban-breeding propensity

## Additional Acknowledgments

We are grateful to the many people who helped with data collection for this study, by completing surveys, providing translations, and sharing information about our study with friends and colleagues. In addition to those acknowledged in the main text, we would like to thank A. Ruiz Leal, Aasheesh Pittie, Abhijit Menon-Sen, Abubakr Mohammad, Ada Echevarria, Adrián Antúnez, Adrián Azpiroz, Ady Kristanto, Agustín Zarco, Alberto Macias, Alejandro Perlaza Gamboa, Aleksandra Pepekowska-Król, Alena Klvaňová, Alexander Lees, Alexander Mitschke, Alexander Ponomarenko, Alexandre Vintchevski, Allen T. Chartier, Amanda Guercio, Anand Pendharkar, Anand Sundaram, André Vielma Mansilla, Andrea Corso, Andrew de Blocq, Andrew Hart, Andrey Kovalenko, Andris Dekants, Andriy Bokotey, Andy Engilis, Andy Mabbett, Andy Musgrove, Anelisa Ferreira de Almeida Magalhães, Angel Guardiola Gómez, April Olson, Arery Muñoz, Armenian Society for the Protection of Birds, Arne Jent Lesterhuis, Ashanti African Tours, Ashok Kumar Sharma, Aves de la Laguna, B.G. Sloan, Benoit Maire, Berinaldo Bueno, Bill Rowe, Birding Ecotours (Johannesberg), Bishwaranjan Mohanty, Blaine Carnes, Bob Kortright, Bram Piot, Brent Ortego, Bruce Di Labio, Bruno Portier, Bryant Olsen, Bulgarian Society for the Protection of Birds - BirdLife Bulgaria, C. Can Bilgin, Cameron Ghalambor, Carles Oliver, Carolina Prudente de Oliveira, Carolina Tosta, Chan-Ryul Park, Chris Lotz, Christian Olaciregui, Christine Southwick, Claire Gallagher, Clive Mann, Craig Brelsford, Cristian Mihai, Csaba Lendvai, D. Caron (Manchester), Dan Potts, Dani Dragan, Daniel Almiron, Daniel Cadena, Daniel Dias, Daniel Martínez Castaño, Daniel Teodoro Esser Neto, Danilo Etechebere, Darryl Jones, Dave Brown, David Ascanio, David Muth, David Warrington, Dennis Paulson, Derek Pomeroy, Derek Schuurman, Dhuha Abdul-Hamid Al-Hashemi, Diana Flora Padrón Novoa, Dick Hoffman, Diego F. Cisneros-Heredia, Dolores Hidalgo, Dongming Li, Doug Knapp, Dragan Simic, Dustin Wang, Eduardo R. Alexandrino, Efrén Hernández, Ellen Blackstone, Emily Rondel, Emin Yogurtcuoglu, Emmanuel M. Loqueh, Eran Tomer, Eric Gyllenhaal, Erik Enbody, Ernesto Ruelas Inzunza, Fares Khoury, Fataï Aina, Fernando Angulo Pratolongo, Florin Chirila, Francisco A. García Castellanos, Francisco Javier Almansa Paredes, Francisco Javier García-Gans, Francisco Robledano, François Shaffer, Frank Rheindt, Frank Willems, Frédéric Dupuy, Fulvio Fraticelli, Fundación Miguel Lillo (Argentina), Gang Wang, Ganjar Cahyadi, Geert Groot Koerkamp, Geoff Carpentier, Geoffrey Williamson, Georgann Schmalz, George Eshiamwata, Gerard Gorman, Gilberto Flores-Walter, Girish Punjabi, Giuseppe Bogliani, Glenn Ousset, Gombobaatar Sundev, Gou Jun, Graham Bundy, Greg Hanisek, Greg Neise, Gus Yaki, Gustavo Gonsioroski, Hernan Perlaza, Hiroshi Hashimoto, Hopeland (Chennai), Hugo Rainey, Hugo Rodríguez-García, Iain Fleming, Ian Harrison, Ian Woodward, Ilhami Kiziroglu, Ion Grosu, İhsan Eroğlu, Ivana Schoepf, Jacinto Martinez, Jack Park, Jakarta Birdwatcher's Society, January Nicholaus Ching'enya, Jay Kaplan, Jeanette Frazier, Jeffrey Sanders, Jeisson Zamudio, Jennifer Backo, Jenny Ouyang, Jens Hering, Jesper Johannes Madsen, Jevgeni Shergalin, Jim Danzenbaker, Jin Hwan Choi, Jip Louwe Kooijmans, Jo Ann MacKenzie, Joachim Weiss, Joan Carles Boncompte, João Henrique Dittmar Filho, João Menezes, Joël Coutu, John Miskell, Jonatas Rocha, Joost Brouwer, Josmar Esteban, Marquez Alvarado, Juan Freile Ortiz, Juan Klavins, Juan Pérez-García, Julia Pierini, Julie A. Craves, Julio Amaro Betto Monsalvo, Justin Watts, Kai Gauger, Karlla Barbosa, Kate Wallace, Kazimierz Walasz, Keith Evans, Keith Russell, Kelley

McHenry, Kenyon Moon, Kerem Ali Boyla, Kim Blomme, Kresimir Mikulic, Kun-Hai Lin, Laura Borse, Laura Peskin, Leander Khil, Lee-Lien Wang, Leo Campagna, Leonardo Victor, Levon Harutyunyan, Li Jianping, Lisandro Moran, Lubomir Peske, Luc Blanchette, Lucía Belén Vera Dominguez, Luciano Ruggieri: EBN Italia, Lucienne Wilmé, Luis Martinez-Mena, Luis Muñoz, Luiz Trinchão, Lynne Freeman, M. Elisa Fanjul, M. Isabel Gómez, M. Valeria Martínez, Maciej Luniak, Manuel Andres Sanchez Martinez, Marc Nollet, Marcio Efe, Marina Nova, Marine Le Louarn, Mario Cohn-Haft, Maristela Benites, Mark Bonta, Mark Cranford, Mark Jason Villa, Mark Walters, Martin O'Brien, Martin Weggler, Mary Crickmore, Masahiko Hibino, Mauricio Ugarte, Mauro Guimarães Diniz, Maxime Zucca, Menno Schilthuis, Michael Mills, Michel Bertrand, Miguel Angel Aponte Justiniano, Miguel Matta, Mike Clarke, Mike Houck, Mikhail Banik, Mikhail Markovets, Momoh Sesay, Mongolian Ornithological Society, Moses Massah, Mudhafar Salim, Muhammad Iqbal, Muntasir Akash, Naim Beg, Namassivayan L, Natali Vilic, Natalia Kolyakina, Natalja Reshetkova, Niall Keogh, Nick Brickle, Nick Fry, Nick Upton, Nik Borrow, Numerov A. (Voronezh), Oleksandr Ruchko, Olga Babushkina, Oliver Burrus, Olivier Barden, Ondřej Sedláček, Orlando J. Torres, Oscar Gonzalez, Oscar Humberto Marín Gómez, Pablo Cerqueira, Pablo Eguia, Patrick Bergier, Paul Isenmann, Paulo Boute, Pedro Sánchez Ruiz, Peng Cui, Petar Dilchev, Petar Iankov, Pete Leonard, Peter Turner, Peter Yaukey, Philippe Clergeau, Phoua Vang, Pier Francesco Pandolfi de Rinaldis, Pierre-Yves Henry, Pilar Carbó Ramírez, Prashanth N S, Quentin Brown, Rachel Thiel, Rafael Sánchez, Rainer Altenkamp, Randy Shonkwiler, Rapa Lorenzo, Rebecca Calisi, Renato Gaban Lima, Rene de Roland Lily Arison, Riadh Moulai, Ricardo Gagliardi, Richard Hoath, Rob P. Clay, Rob Parsons, Robert Guth, Robert Janssen, Roberto Thomson, Rodolfo Marliani, Rolf Nessing, Rollin Deas, Roman Martin, Ron Demey, Ron Johnstone, Rubén Darío Palacio, Ruben Saey, Rudy Gelis, Ruslan Urazaliyev, Sabina Caula, San Luis de la Paz, Sasha Kitaysky, Sayam Chowdhury, Sean Kelly, Seejan (Earlybirdbirders, Nepal), Sergej A. Soloviev, Sergio Chaparro Herrera, Sergio Gabriel Sanchez, Sergio Rios, Shimada Akihide, Shuping Zhang, Shupova Tatiana, Sidiq Pambudi, Sidnei Dantas, Simon Liao, Somoyita Sur, Stanislav Viter, Stefan Brehme, Stefan Hage, Stefano Zanotto, Stephen Ambrose, Steve Goodman, Stewart Wechsler, Subramanian Sankar, Szalai Kornél, Taku Awa II, Tatiana Guerrero Vallejos, Terry Pavletic, Terry Townshend, Terry Whittam, Thierry Helsens, Thomas Giglio, Thomas Latt, Tim McCarthy, Tiwonge Gawa, Togarasei Fakarayi, Tom Ledford, Tommy P. Pedersen, Tony Russell, Tran Long, Tyler Hoar, Vasily Pchelintsev, Vedran Lucić, Vicente Giménez, Victor Cueto, Vikrant Choursiya, W. Hum, Wand Ali, Washington Wachira, Wen-Loung Lin, Willem Van Den Bossche, Wouter Faveyts, Yongjie Wu, Yves Gauthier, Yvonne Pigott, Zheng Guang-Mei, Zülfü Ferecli, and many anonymous respondents.

## References

1. Paradis E, *et al.* (2016) *ape*: Analyses of phylogenetics and evolution. R package version 3.5.
2. Gill F, Donsker D (2016) *IOC World Bird List (v 6.2)*, <http://www.worldbirdnames.org/>.
3. Jetz W, Thomas GH, Joy JB, Hartmann K, Mooers AO (2012) The global diversity of birds in space and time. *Nature* 491:444-448.
4. Wolf JB, *et al.* (2010) Nucleotide divergence vs. gene expression differentiation: comparative transcriptome sequencing in natural isolates from the carrion crow and its hybrid zone with the hooded crow. *Mol Ecol* 19:162-175.
5. Bjornstad ON (2018) *ncf*: Spatial nonparametric covariance functions. R package version 1.2-1.
6. Hadfield J (2011) <https://stat.ethz.ch/pipermail/r-sig-mixed-models/2011q2/016366.html>.
7. Pinheiro J, *et al.* (2016) *nlme*: Linear and nonlinear mixed effects models. R package version 3.1-128.
8. Zuur AF, Ieno EN, Walker NJ, Saveliev AA, Smith GM (2009) *Mixed Effects Models and Extensions in Ecology with R* (Springer, New York).

**List of the cities for which we obtained breeding bird occurrence data used in this study ( $N = 260$  cities).**

| <b>Continent<sup>1</sup></b> | <b>Country</b>                      | <b>City</b>  | <b>Latitude<br/>(degrees)</b> | <b>Longitude<br/>(degrees)</b> | <b>Human<br/>Population<sup>2</sup></b> | <b>Number of<br/>completed surveys</b> |
|------------------------------|-------------------------------------|--------------|-------------------------------|--------------------------------|-----------------------------------------|----------------------------------------|
| Africa                       | Algeria                             | Algiers      | 36.75                         | 3.06                           | 1,569,897                               | 1                                      |
| Africa                       | Angola                              | Luanda       | -8.84                         | 13.29                          | 2,776,168                               | 1                                      |
| Africa                       | Benin                               | Cotonou      | 6.37                          | 2.39                           | 780,000                                 | 1                                      |
| Africa                       | Cameroon                            | Yaoundé      | 3.85                          | 11.50                          | 1,817,524                               | 2                                      |
| Africa                       | Côte d'Ivoire                       | Abidjan      | 5.36                          | -4.01                          | 1,929,079                               | 1                                      |
| Africa                       | Democratic Republic of<br>the Congo | Kinshasa     | -4.39                         | 15.97                          | 7,785,965                               | 1                                      |
| Africa                       | Egypt                               | Cairo        | 30.04                         | 31.24                          | 7,771,617                               | 1                                      |
| Africa                       | Ethiopia                            | Addis Ababa  | 8.98                          | 38.76                          | 2,757,729                               | 1                                      |
| Africa                       | Ghana                               | Accra        | 5.60                          | -0.19                          | 1,594,419                               | 1                                      |
| Africa                       | Ghana                               | Kumasi       | 6.67                          | -1.62                          | 1,730,249                               | 1                                      |
| Africa                       | Guinea                              | Conakry      | 9.64                          | -13.58                         | 1,091,500                               | 1                                      |
| Africa                       | Kenya                               | Nairobi      | -1.29                         | 36.82                          | 3,133,518                               | 2                                      |
| Africa                       | Liberia                             | Monrovia     | 6.29                          | -10.76                         | 970,824                                 | 1                                      |
| Africa                       | Libya                               | Tripoli      | 32.89                         | 13.19                          | 1,150,989                               | 2                                      |
| Africa                       | Madagascar                          | Antananarivo | -18.88                        | 47.51                          | 1,300,000                               | 2                                      |
| Africa                       | Malawi                              | Lilongwe     | -13.96                        | 33.77                          | 1,087,917                               | 2                                      |
| Africa                       | Mali                                | Bamako       | 12.64                         | -8.00                          | 1,810,366                               | 1                                      |
| Africa                       | Morocco                             | Casablanca   | 33.57                         | -7.59                          | 3,144,909                               | 1                                      |
| Africa                       | Morocco                             | Fes          | 34.02                         | -5.01                          | 964,891                                 | 1                                      |
| Africa                       | Morocco                             | Marrakesh    | 31.63                         | -7.98                          | 839,296                                 | 2                                      |
| Africa                       | Niger                               | Niamey       | 13.51                         | 2.13                           | 774,235                                 | 1                                      |
| Africa                       | Nigeria                             | Ibadan       | 7.38                          | 3.95                           | 1,835,300                               | 1                                      |
| Africa                       | Senegal                             | Dakar        | 14.76                         | -17.37                         | 1,056,009                               | 1                                      |

|        |                      |                       |        |        |            |   |
|--------|----------------------|-----------------------|--------|--------|------------|---|
| Africa | Sierra Leone         | Freetown              | 8.47   | -13.23 | 802,639    | 1 |
| Africa | Somalia              | Mogadishu             | 2.05   | 45.32  | 2,587,183  | 1 |
| Africa | South Africa         | Cape Town             | -33.92 | 18.42  | 987,007    | 3 |
| Africa | South Africa         | Port Elizabeth        | -33.71 | 25.52  | 775,255    | 1 |
| Africa | South Africa         | Soweto / Johannesburg | -26.25 | 27.85  | 904,165    | 1 |
| Africa | Sudan                | Khartoum              | 15.50  | 32.56  | 1,974,647  | 2 |
| Africa | Tanzania             | Dar es Salaam         | -6.79  | 39.21  | 1,360,850  | 1 |
| Africa | Uganda               | Kampala               | 0.35   | 32.58  | 1,516,210  | 1 |
| Africa | Zambia               | Lusaka                | -15.39 | 28.32  | 1,747,152  | 1 |
| Africa | Zimbabwe             | Harare                | -17.83 | 31.03  | 1,485,231  | 1 |
| Asia   | Afghanistan          | Kabul                 | 34.56  | 69.21  | 3,043,532  | 2 |
| Asia   | Armenia              | Yerevan               | 40.18  | 44.50  | 1,060,138  | 2 |
| Asia   | Azerbaijan           | Baku                  | 40.41  | 49.87  | 2,166,355  | 3 |
| Asia   | Bangladesh           | Chittagong            | 22.35  | 91.81  | 2,023,489  | 2 |
| Asia   | Bangladesh           | Dhaka                 | 23.81  | 90.41  | 5,333,571  | 2 |
| Asia   | Bangladesh           | Khulna                | 22.85  | 89.54  | 770,498    | 2 |
| Asia   | Cambodia             | Phnom Penh            | 11.54  | 104.89 | 1,573,544  | 3 |
| Asia   | China                | Beijing               | 39.90  | 116.41 | 11,509,595 | 3 |
| Asia   | China                | Chengdu               | 30.57  | 104.07 | 4,333,541  | 1 |
| Asia   | China                | Shanghai              | 31.23  | 121.47 | 14,348,535 | 2 |
| Asia   | China                | Shijiazhuang          | 38.04  | 114.51 | 1,969,975  | 2 |
| Asia   | China                | Ürümqi                | 43.83  | 87.62  | 1,753,298  | 1 |
| Asia   | China                | Yantai                | 37.46  | 121.45 | 1,724,404  | 1 |
| Asia   | China, Hong Kong SAR | Hong Kong             | 22.40  | 114.11 | 7,241,700  | 1 |
| Asia   | Georgia              | Tbilisi               | 41.72  | 44.83  | 1,172,700  | 1 |
| Asia   | India                | Bangalore             | 12.97  | 77.59  | 5,701,446  | 2 |
| Asia   | India                | Chennai (Madras)      | 13.08  | 80.27  | 6,560,242  | 3 |
| Asia   | India                | Delhi                 | 28.61  | 77.21  | 12,877,470 | 1 |
| Asia   | India                | Durg-Bhilai Nagar     | 21.19  | 81.35  | 927,864    | 1 |

|      |            |                 |       |        |            |   |
|------|------------|-----------------|-------|--------|------------|---|
| Asia | India      | Guwahati        | 26.14 | 91.74  | 818,809    | 1 |
| Asia | India      | Hyderabad       | 17.39 | 78.49  | 5,742,036  | 1 |
| Asia | India      | Jaipur          | 26.91 | 75.79  | 2,322,575  | 1 |
| Asia | India      | Kanpur          | 26.45 | 80.33  | 2,715,555  | 2 |
| Asia | India      | Kozhikode       | 11.26 | 75.78  | 880,247    | 1 |
| Asia | India      | Ludhiana        | 30.90 | 75.86  | 1,398,467  | 1 |
| Asia | India      | Madurai         | 9.93  | 78.12  | 1,203,095  | 1 |
| Asia | India      | Mumbai (Bombay) | 19.08 | 72.88  | 16,434,386 | 5 |
| Asia | India      | Mysore          | 12.30 | 76.64  | 799,228    | 1 |
| Asia | India      | Nagpur          | 21.15 | 79.09  | 2,129,500  | 1 |
| Asia | India      | Pune            | 18.52 | 73.86  | 3,760,636  | 4 |
| Asia | India      | Salem           | 11.66 | 78.15  | 751,438    | 1 |
| Asia | Indonesia  | Bandung         | -6.92 | 107.62 | 2,394,873  | 2 |
| Asia | Indonesia  | Jakarta         | -6.17 | 106.82 | 9,607,787  | 1 |
| Asia | Indonesia  | Palembang       | -2.98 | 104.78 | 1,455,284  | 1 |
| Asia | Indonesia  | Surabaya        | -7.26 | 112.75 | 2,765,487  | 1 |
| Asia | Iraq       | Baghdad         | 33.31 | 44.36  | 3,841,268  | 2 |
| Asia | Japan      | Hiroshima       | 34.39 | 132.46 | 1,173,843  | 1 |
| Asia | Japan      | Nagoya          | 35.18 | 136.91 | 2,263,894  | 2 |
| Asia | Japan      | Osaka           | 34.69 | 135.50 | 2,665,314  | 1 |
| Asia | Japan      | Sapporo         | 43.06 | 141.35 | 1,913,545  | 1 |
| Asia | Japan      | Sendai          | 38.27 | 140.87 | 1,045,986  | 2 |
| Asia | Jordan     | Amman           | 31.96 | 35.95  | 1,055,262  | 3 |
| Asia | Kazakhstan | Almaty          | 43.22 | 76.85  | 1,507,509  | 2 |
| Asia | Kazakhstan | Astana          | 51.16 | 71.47  | 814,435    | 3 |
| Asia | Malaysia   | Kuala Lumpur    | 3.14  | 101.69 | 1,588,750  | 1 |
| Asia | Mongolia   | Ulaanbaatar     | 47.89 | 106.91 | 1,367,508  | 1 |
| Asia | Myanmar    | Yangon          | 16.87 | 96.20  | 5,209,541  | 1 |
| Asia | Nepal      | Kathmandu       | 27.72 | 85.32  | 1,003,285  | 2 |

|           |                      |                      |        |        |           |   |
|-----------|----------------------|----------------------|--------|--------|-----------|---|
| Asia      | Oman                 | Muscat               | 23.59  | 58.41  | 797,000   | 1 |
| Asia      | Pakistan             | Karachi              | 24.86  | 67.01  | 9,339,023 | 1 |
| Asia      | Philippines          | Cebu                 | 10.32  | 123.89 | 866,171   | 3 |
| Asia      | Philippines          | Quezon City / Manila | 14.68  | 121.04 | 2,761,720 | 3 |
| Asia      | Qatar                | Doha                 | 25.29  | 51.53  | 796,947   | 1 |
| Asia      | Republic of Korea    | Seoul                | 37.57  | 126.98 | 9,860,372 | 8 |
| Asia      | Russian Federation   | Ekaterinburg         | 56.84  | 60.61  | 1,420,285 | 1 |
| Asia      | Saudi Arabia         | Jiddah               | 21.29  | 39.24  | 2,801,481 | 1 |
| Asia      | Singapore            | Singapore            | 1.35   | 103.82 | 5,469,724 | 5 |
| Asia      | Syria                | Damascus             | 33.51  | 36.28  | 1,569,394 | 2 |
| Asia      | Syria                | Homs                 | 34.73  | 36.71  | 775,404   | 2 |
| Asia      | Taiwan               | Kaohsiung City       | 22.63  | 120.30 | 1,519,711 | 1 |
| Asia      | Taiwan               | Taichung             | 24.15  | 120.67 | 1,040,725 | 3 |
| Asia      | Taiwan               | Taipei               | 25.03  | 121.57 | 7,871,900 | 2 |
| Asia      | Thailand             | Bangkok              | 13.76  | 100.50 | 8,305,218 | 2 |
| Asia      | United Arab Emirates | Dubai                | 25.20  | 55.27  | 1,137,347 | 2 |
| Asia      | Vietnam              | Ho Chi Minh City     | 10.82  | 106.63 | 3,467,331 | 1 |
| Australia | Australia            | Adelaide             | -34.93 | 138.60 | 1,263,888 | 1 |
| Australia | Australia            | Brisbane             | -27.47 | 153.02 | 2,143,121 | 2 |
| Australia | Australia            | Melbourne            | -37.81 | 144.96 | 4,181,021 | 2 |
| Australia | Australia            | Perth                | -31.95 | 115.86 | 1,901,582 | 3 |
| Australia | Australia            | Sydney               | -33.87 | 151.21 | 4,373,433 | 1 |
| Australia | New Zealand          | Auckland             | -36.85 | 174.76 | 1,526,900 | 1 |
| Europe    | Austria              | Wien                 | 48.21  | 16.37  | 1,766,746 | 3 |
| Europe    | Belarus              | Minsk                | 53.90  | 27.56  | 1,911,433 | 1 |
| Europe    | Belgium              | Bruxelles (Brussels) | 50.85  | 4.35   | 1,561,395 | 2 |
| Europe    | Bulgaria             | Sofia                | 42.70  | 23.32  | 1,210,820 | 2 |
| Europe    | Croatia              | Zagreb               | 45.82  | 15.98  | 790,017   | 2 |
| Europe    | Czech Republic       | Praha                | 50.08  | 14.44  | 1,244,762 | 3 |



|        |                     |                     |       |       |            |    |
|--------|---------------------|---------------------|-------|-------|------------|----|
| Europe | Denmark             | Copenhagen          | 55.68 | 12.57 | 1,153,615  | 2  |
| Europe | France              | Bordeaux            | 44.84 | -0.58 | 843,425    | 1  |
| Europe | France              | Marseille           | 43.30 | 5.37  | 1,559,789  | 1  |
| Europe | France              | Paris               | 48.86 | 2.35  | 10,460,118 | 4  |
| Europe | Germany             | Berlin              | 52.52 | 13.41 | 3,421,829  | 3  |
| Europe | Germany             | Hamburg             | 53.55 | 9.99  | 1,746,342  | 1  |
| Europe | Germany             | München (Munich)    | 48.14 | 11.58 | 1,407,836  | 2  |
| Europe | Greece              | Athina              | 37.98 | 23.73 | 789,166    | 3  |
| Europe | Hungary             | Budapest            | 47.50 | 19.04 | 2,548,428  | 4  |
| Europe | Ireland             | Dublin              | 53.35 | -6.26 | 1,110,627  | 2  |
| Europe | Italy               | Milano              | 45.47 | 9.19  | 1,293,135  | 3  |
| Europe | Italy               | Napoli              | 40.85 | 14.27 | 974,082    | 2  |
| Europe | Italy               | Roma                | 41.90 | 12.50 | 2,751,082  | 4  |
| Europe | Italy               | Torino              | 45.07 | 7.69  | 887,114    | 5  |
| Europe | Latvia              | Riga                | 56.95 | 24.11 | 764,329    | 3  |
| Europe | Netherlands         | Amsterdam           | 52.37 | 4.90  | 1,068,724  | 1  |
| Europe | Poland              | Kraków              | 50.06 | 19.95 | 759,131    | 2  |
| Europe | Poland              | Łódź                | 51.76 | 19.46 | 756,666    | 1  |
| Europe | Poland              | Warszawa            | 52.23 | 21.01 | 1,711,324  | 2  |
| Europe | Republic of Moldova | Chişinău (Kishinev) | 47.01 | 28.86 | 785,917    | 1  |
| Europe | Romania             | Bucuresti           | 44.43 | 26.10 | 1,912,515  | 7  |
| Europe | Russian Federation  | Moskva              | 55.76 | 37.62 | 11,918,057 | 2  |
| Europe | Russian Federation  | St. Petersburg      | 59.93 | 30.34 | 4,990,602  | 1  |
| Europe | Russian Federation  | Volgograd           | 48.71 | 44.51 | 1,018,762  | 1  |
| Europe | Russian Federation  | Voronezh            | 51.68 | 39.21 | 997,447    | 1  |
| Europe | Serbia              | Beograd (Belgrade)  | 44.79 | 20.45 | 1,669,552  | 2  |
| Europe | Spain               | Barcelona           | 41.39 | 2.17  | 1,607,104  | 1  |
| Europe | Spain               | Madrid              | 40.42 | -3.70 | 3,186,241  | 1  |
| Europe | Spain               | Murcia              | 37.99 | -1.13 | 772,211    | 16 |

|               |                    |                       |       |         |            |    |
|---------------|--------------------|-----------------------|-------|---------|------------|----|
| Europe        | Spain              | Sevilla               | 37.39 | -5.98   | 984,092    | 1  |
| Europe        | Spain              | Valencia              | 39.47 | -0.38   | 789,364    | 3  |
| Europe        | Sweden             | Göteborg (Gothenburg) | 57.71 | 11.97   | 883,764    | 2  |
| Europe        | Sweden             | Stockholm             | 59.33 | 18.07   | 789,024    | 1  |
| Europe        | Switzerland        | Zürich                | 47.38 | 8.54    | 1,210,875  | 2  |
| Europe        | Turkey             | Ankara                | 39.93 | 32.86   | 3,517,182  | 5  |
| Europe        | Turkey             | Antalya               | 36.90 | 30.71   | 758,188    | 1  |
| Europe        | Turkey             | Istanbul              | 41.01 | 28.98   | 11,174,257 | 3  |
| Europe        | Ukraine            | Dnepropetrovsk        | 48.46 | 35.05   | 990,025    | 2  |
| Europe        | Ukraine            | Kharkov               | 49.99 | 36.23   | 1,431,461  | 2  |
| Europe        | Ukraine            | Kiev                  | 50.45 | 30.52   | 2,803,716  | 3  |
| Europe        | Ukraine            | Lvov                  | 49.84 | 24.03   | 751,225    | 2  |
| Europe        | Ukraine            | Odessa                | 46.48 | 30.72   | 997,189    | 1  |
| Europe        | United Kingdom     | London                | 51.51 | -0.13   | 8,278,251  | 3  |
| Europe        | United Kingdom     | Manchester            | 53.48 | -2.24   | 2,244,931  | 5  |
| Europe        | United Kingdom     | Tyneside              | 54.99 | -1.45   | 879,996    | 1  |
| Europe        | United Kingdom     | West Midlands         | 52.48 | -1.83   | 2,284,093  | 2  |
| North America | Canada             | Calgary               | 51.05 | -114.07 | 1,406,721  | 3  |
| North America | Canada             | Edmonton              | 53.54 | -113.49 | 1,328,290  | 5  |
| North America | Canada             | Montréal              | 45.50 | -73.57  | 4,027,121  | 5  |
| North America | Canada             | Ottawa                | 45.42 | -75.70  | 1,318,122  | 9  |
| North America | Canada             | Québec                | 46.81 | -71.21  | 799,632    | 5  |
| North America | Canada             | Toronto               | 43.65 | -79.38  | 6,055,724  | 38 |
| North America | Canada             | Vancouver             | 49.28 | -123.12 | 2,470,289  | 11 |
| North America | Canada             | Winnipeg              | 49.90 | -97.14  | 782,640    | 3  |
| North America | Cuba               | La Habana             | 23.11 | -82.37  | 2,121,871  | 1  |
| North America | Dominican Republic | Santo Domingo         | 18.49 | -69.93  | 965,040    | 1  |
| North America | Guatemala          | Ciudad de Guatemala   | 14.63 | -90.51  | 1,022,001  | 1  |
| North America | Honduras           | Tegucigalpa           | 14.07 | -87.19  | 765,675    | 1  |

|               |                          |                                                  |       |         |            |    |
|---------------|--------------------------|--------------------------------------------------|-------|---------|------------|----|
| North America | Jamaica                  | Kingston                                         | 18.02 | -76.81  | 937,700    | 1  |
| North America | Mexico                   | Aguascalientes                                   | 21.89 | -102.29 | 932,369    | 1  |
| North America | Mexico                   | Chihuahua                                        | 28.63 | -106.07 | 852,533    | 1  |
| North America | Mexico                   | Ciudad de Mexico                                 | 19.43 | -99.13  | 20,116,842 | 2  |
| North America | Mexico                   | Ciudad Del Carmen                                | 18.65 | -91.81  | 17,963,196 | 1  |
| North America | Mexico                   | Coatzacoalcos                                    | 18.13 | -94.46  | 1,301,452  | 1  |
| North America | Mexico                   | Guadalajara                                      | 20.66 | -103.35 | 4,434,878  | 1  |
| North America | Mexico                   | Irapuato                                         | 20.68 | -101.35 | 3,764,371  | 1  |
| North America | Mexico                   | Mérida                                           | 20.97 | -89.59  | 973,046    | 1  |
| North America | Mexico                   | Morelia                                          | 19.71 | -101.20 | 807,902    | 2  |
| North America | Mexico                   | San Luis Potosí - Soledad de<br>Graciano Sanchez | 22.16 | -100.99 | 1,040,443  | 1  |
| North America | Mexico                   | Santiago de Querétaro                            | 20.59 | -100.39 | 1,097,025  | 1  |
| North America | Mexico                   | Torreón                                          | 25.54 | -103.41 | 1,215,817  | 1  |
| North America | Mexico                   | Veracruz                                         | 19.17 | -96.13  | 801,295    | 1  |
| North America | Mexico                   | Villahermosa                                     | 17.99 | -92.95  | 755,425    | 1  |
| North America | Nicaragua                | Managua                                          | 12.12 | -86.24  | 908,892    | 1  |
| North America | United States of America | Atlanta (GA)                                     | 33.75 | -84.39  | 3,499,840  | 3  |
| North America | United States of America | Austin (TX)                                      | 30.27 | -97.74  | 842,592    | 4  |
| North America | United States of America | Boston (MA)                                      | 42.36 | -71.06  | 4,032,484  | 2  |
| North America | United States of America | Charlotte (NC)                                   | 35.23 | -80.84  | 775,202    | 3  |
| North America | United States of America | Chicago (IL)                                     | 41.88 | -87.63  | 2,714,856  | 22 |
| North America | United States of America | Cincinnati (OH)                                  | 39.10 | -84.51  | 1,503,262  | 1  |
| North America | United States of America | Cleveland (OH)                                   | 41.50 | -81.69  | 1,786,647  | 3  |
| North America | United States of America | Columbus (OH)                                    | 39.96 | -83.00  | 809,798    | 1  |
| North America | United States of America | Dallas (TX)                                      | 32.78 | -96.80  | 1,241,162  | 6  |
| North America | United States of America | Denver (CO)                                      | 39.74 | -104.99 | 1,984,887  | 6  |
| North America | United States of America | Detroit (MI)                                     | 42.33 | -83.05  | 910,921    | 3  |
| North America | United States of America | Hartford (CT)                                    | 41.76 | -72.69  | 851,535    | 1  |

|               |                          |                     |        |         |            |    |
|---------------|--------------------------|---------------------|--------|---------|------------|----|
| North America | United States of America | Houston (TX)        | 29.76  | -95.37  | 2,160,821  | 1  |
| North America | United States of America | Indianapolis (IN)   | 39.77  | -86.16  | 834,852    | 2  |
| North America | United States of America | Jacksonville (FL)   | 30.33  | -81.66  | 836,507    | 1  |
| North America | United States of America | Kansas City (MO)    | 39.10  | -94.58  | 1,361,744  | 1  |
| North America | United States of America | Las Vegas (NV)      | 36.17  | -115.14 | 1,314,357  | 1  |
| North America | United States of America | Los Angeles (CA)    | 34.05  | -118.24 | 3,857,799  | 5  |
| North America | United States of America | Louisville (KY)     | 38.25  | -85.76  | 863,582    | 2  |
| North America | United States of America | Memphis (TN)        | 35.15  | -90.05  | 972,091    | 1  |
| North America | United States of America | Miami (FL)          | 25.76  | -80.19  | 4,919,036  | 2  |
| North America | United States of America | Milwaukee (WI)      | 43.04  | -87.91  | 1,308,913  | 2  |
| North America | United States of America | Minneapolis (MN)    | 44.98  | -93.27  | 2,388,593  | 5  |
| North America | United States of America | New Orleans (LA)    | 29.95  | -90.07  | 1,009,283  | 11 |
| North America | United States of America | New York (NY)       | 40.71  | -74.01  | 8,336,697  | 2  |
| North America | United States of America | Orlando (FL)        | 28.54  | -81.38  | 1,157,431  | 1  |
| North America | United States of America | Philadelphia (PA)   | 39.95  | -75.17  | 1,547,607  | 2  |
| North America | United States of America | Phoenix (AZ)        | 33.45  | -112.07 | 1,488,750  | 2  |
| North America | United States of America | Pittsburgh (PA)     | 40.44  | -80.00  | 1,753,136  | 2  |
| North America | United States of America | Portland (OR)       | 45.52  | -122.68 | 1,583,138  | 3  |
| North America | United States of America | Richmond (VA)       | 37.54  | -77.44  | 818,836    | 2  |
| North America | United States of America | Sacramento (CA)     | 38.58  | -121.49 | 1,393,498  | 7  |
| North America | United States of America | Salt Lake City (UT) | 40.76  | -111.89 | 887,650    | 7  |
| North America | United States of America | San Antonio (TX)    | 29.42  | -98.49  | 1,382,951  | 3  |
| North America | United States of America | San Jose (CA)       | 37.34  | -121.89 | 982,765    | 1  |
| North America | United States of America | Seattle (WA)        | 47.61  | -122.33 | 2,712,205  | 22 |
| North America | United States of America | St. Louis (MO)      | 38.63  | -90.20  | 2,077,662  | 2  |
| North America | United States of America | Tampa (FL)          | 27.95  | -82.46  | 2,062,339  | 1  |
| North America | United States of America | Virginia Beach (VA) | 36.85  | -75.98  | 1,394,439  | 1  |
| North America | United States of America | Washington (DC)     | 38.91  | -77.04  | 3,933,920  | 3  |
| South America | Argentina                | Buenos Aires        | -34.60 | -58.38  | 12,847,328 | 5  |

|               |           |                      |        |        |            |   |
|---------------|-----------|----------------------|--------|--------|------------|---|
| South America | Argentina | Córdoba              | -31.42 | -64.19 | 1,517,610  | 2 |
| South America | Argentina | Mendoza              | -32.89 | -68.85 | 1,079,744  | 1 |
| South America | Argentina | Tucumán - Tafí Viejo | -26.73 | -65.27 | 867,724    | 1 |
| South America | Bolivia   | La Paz               | -16.49 | -68.12 | 789,585    | 2 |
| South America | Bolivia   | Santa Cruz           | -17.81 | -63.16 | 1,113,582  | 1 |
| South America | Brazil    | Belém                | -1.46  | -48.49 | 1,381,475  | 2 |
| South America | Brazil    | Belo Horizonte       | -19.92 | -43.94 | 2,375,151  | 5 |
| South America | Brazil    | Brasilia             | -15.79 | -47.88 | 2,481,272  | 2 |
| South America | Brazil    | Campo Grande         | -20.47 | -54.62 | 776,242    | 6 |
| South America | Brazil    | Curitiba             | -25.42 | -49.27 | 1,751,907  | 6 |
| South America | Brazil    | Goiânia              | -16.69 | -49.26 | 1,297,154  | 1 |
| South America | Brazil    | Maceió               | -9.65  | -35.71 | 932,078    | 2 |
| South America | Brazil    | Manaus               | -3.12  | -60.02 | 1,792,881  | 1 |
| South America | Brazil    | Recife               | -8.05  | -34.88 | 1,537,704  | 1 |
| South America | Brazil    | Rio de Janeiro       | -22.91 | -43.17 | 6,320,446  | 3 |
| South America | Brazil    | Salvador             | -12.97 | -38.50 | 2,674,923  | 3 |
| South America | Brazil    | São Luís             | -2.54  | -44.28 | 958,545    | 2 |
| South America | Brazil    | São Paulo            | -23.55 | -46.63 | 11,152,968 | 8 |
| South America | Brazil    | Teresina             | -5.09  | -42.80 | 767,559    | 1 |
| South America | Chile     | Santiago             | -33.45 | -70.67 | 5,150,010  | 3 |
| South America | Colombia  | Barranquilla         | 10.98  | -74.82 | 1,112,889  | 1 |
| South America | Colombia  | Bogotá               | 4.71   | -74.07 | 6,778,691  | 6 |
| South America | Colombia  | Cali                 | 3.45   | -76.54 | 2,075,380  | 6 |
| South America | Colombia  | Medellín             | 6.24   | -75.58 | 2,219,861  | 3 |
| South America | Ecuador   | Guayaquil            | -2.17  | -79.92 | 2,291,158  | 1 |
| South America | Ecuador   | Quito                | -0.18  | -78.47 | 1,619,146  | 4 |
| South America | Paraguay  | Asunción             | -25.26 | -57.58 | 1,620,483  | 5 |
| South America | Peru      | Arequipa             | -16.41 | -71.54 | 784,651    | 1 |
| South America | Peru      | Lima                 | -12.05 | -77.04 | 8,472,935  | 2 |

|               |           |                |        |        |           |   |
|---------------|-----------|----------------|--------|--------|-----------|---|
| South America | Uruguay   | Montevideo     | -34.90 | -56.16 | 1,379,560 | 3 |
| South America | Venezuela | Barquisimeto   | 10.07  | -69.35 | 1,000,632 | 1 |
| South America | Venezuela | Caracas        | 10.48  | -66.90 | 2,104,423 | 7 |
| South America | Venezuela | Ciudad Guayana | 8.37   | -62.65 | 850,262   | 1 |
| South America | Venezuela | Maracaibo      | 10.65  | -71.71 | 1,339,019 | 2 |
| South America | Venezuela | Valencia       | 10.16  | -68.00 | 917,999   | 1 |

---

<sup>1</sup> "North America" includes Central America and the Caribbean; "Australia" includes New Zealand

<sup>2</sup> from United Nations ([data.un.org/](http://data.un.org/); accessed June 2016); for countries missing from the UN dataset, values are from <http://www.geonames.org/>, accessed July 2016

List of the bird species examined in this study.<sup>1</sup>

| Phylogenetically-independent comparison | Taxonomic order  | Taxonomic family  | Genus                | Dominant species    | Subordinate species |
|-----------------------------------------|------------------|-------------------|----------------------|---------------------|---------------------|
| 1                                       | Anseriformes     | Anatidae          | <i>Dendrocygna</i>   | <i>autumnalis</i>   | <i>bicolor</i>      |
| 2                                       | Anseriformes     | Anatidae          | <i>Cygnus</i>        | <i>cygnus</i>       | <i>olor</i>         |
| 2 <sup>2</sup>                          | Anseriformes     | Anatidae          | <i>Cygnus</i>        | <i>buccinator</i>   | <i>olor</i>         |
| 3                                       | Anseriformes     | Anatidae          | <i>Anas</i>          | <i>strepera</i>     | <i>americana</i>    |
| 4                                       | Anseriformes     | Anatidae          | <i>Anas</i>          | <i>discors</i>      | <i>cyanoptera</i>   |
| 5                                       | Anseriformes     | Anatidae          | <i>Anas</i>          | <i>acuta</i>        | <i>carolinensis</i> |
| 6                                       | Anseriformes     | Anatidae          | <i>Aythya</i>        | <i>americana</i>    | <i>collaris</i>     |
| 7                                       | Anseriformes     | Anatidae          | <i>Bucephala</i>     | <i>islandica</i>    | <i>clangula</i>     |
| 8                                       | Galliformes      | Phasianidae       | <i>Tympanuchus</i>   | <i>phasianellus</i> | <i>cupido</i>       |
| 9                                       | Podicipediformes | Podicipedidae     | <i>Podiceps</i>      | <i>grisegena</i>    | <i>auritus</i>      |
| 10                                      | Pelecaniformes   | Ardeidae          | <i>Ardeola</i>       | <i>idaea</i>        | <i>ralloides</i>    |
| 11                                      | Pelecaniformes   | Ardeidae          | <i>Ardea</i>         | <i>cinerea</i>      | <i>alba</i>         |
| 11 <sup>2</sup>                         | Pelecaniformes   | Ardeidae          | <i>Ardea</i>         | <i>herodias</i>     | <i>alba</i>         |
| 12                                      | Pelecaniformes   | Ardeidae          | <i>Egretta</i>       | <i>tricolor</i>     | <i>caerulea</i>     |
| 13                                      | Pelecaniformes   | Ardeidae          | <i>Egretta</i>       | <i>garzetta</i>     | <i>thula</i>        |
| 14                                      | Suliformes       | Phalacrocoracidae | <i>Phalacrocorax</i> | <i>lucidus</i>      | <i>capensis</i>     |
| 15                                      | Accipitriformes  | Cathartidae       | <i>Cathartes</i>     | <i>aura</i>         | <i>burrovianus</i>  |
| 15 <sup>2</sup>                         | Accipitriformes  | Cathartidae       | <i>Cathartes</i>     | <i>aura</i>         | <i>melambrotus</i>  |
| 16                                      | Accipitriformes  | Accipitridae      | <i>Gyps</i>          | <i>rueppellii</i>   | <i>africanus</i>    |
| 16 <sup>2</sup>                         | Accipitriformes  | Accipitridae      | <i>Gyps</i>          | <i>coprotheres</i>  | <i>africanus</i>    |
| 17                                      | Accipitriformes  | Accipitridae      | <i>Accipiter</i>     | <i>gentilis</i>     | <i>cooperii</i>     |
| 18                                      | Accipitriformes  | Accipitridae      | <i>Circus</i>        | <i>pygargus</i>     | <i>aeruginosus</i>  |
| 19                                      | Accipitriformes  | Accipitridae      | <i>Milvus</i>        | <i>migrans</i>      | <i>milvus</i>       |
| 20                                      | Accipitriformes  | Accipitridae      | <i>Haliastur</i>     | <i>indus</i>        | <i>sphenurus</i>    |
| 21                                      | Accipitriformes  | Accipitridae      | <i>Buteo</i>         | <i>swainsoni</i>    | <i>jamaicensis</i>  |

|                 |                  |               |                        |                     |                      |
|-----------------|------------------|---------------|------------------------|---------------------|----------------------|
| 21 <sup>2</sup> | Accipitriformes  | Accipitridae  | <i>Buteo</i>           | <i>swainsoni</i>    | <i>regalis</i>       |
| 22              | Gruiformes       | Rallidae      | <i>Fulica</i>          | <i>armillata</i>    | <i>leucoptera</i>    |
| 23              | Gruiformes       | Gruidae       | <i>Grus</i>            | <i>antigone</i>     | <i>rubicunda</i>     |
| 24              | Charadriiformes  | Charadriidae  | <i>Vanellus</i>        | <i>coronatus</i>    | <i>lugubris</i>      |
| 25              | Charadriiformes  | Charadriidae  | <i>Charadrius</i>      | <i>vociferus</i>    | <i>melodus</i>       |
| 26              | Charadriiformes  | Scolopacidae  | <i>Numenius</i>        | <i>arquata</i>      | <i>phaeopus</i>      |
| 27              | Charadriiformes  | Laridae       | <i>Chroicocephalus</i> | <i>ridibundus</i>   | <i>genei</i>         |
| 28              | Charadriiformes  | Laridae       | <i>Larus</i>           | <i>marinus</i>      | <i>smithsonianus</i> |
| 29              | Charadriiformes  | Laridae       | <i>Sterna</i>          | <i>dougallii</i>    | <i>paradisaea</i>    |
| 30              | Columbiformes    | Columbidae    | <i>Columba</i>         | <i>palumbus</i>     | <i>oenas</i>         |
| 31              | Columbiformes    | Columbidae    | <i>Streptopelia</i>    | <i>decaocto</i>     | <i>turtur</i>        |
| 32              | Columbiformes    | Columbidae    | <i>Spilopelia</i>      | <i>chinensis</i>    | <i>senegalensis</i>  |
| 33              | Cuculiformes     | Cuculidae     | <i>Crotophaga</i>      | <i>ani</i>          | <i>sulcirostris</i>  |
| 34              | Strigiformes     | Strigidae     | <i>Bubo</i>            | <i>lacteus</i>      | <i>africanus</i>     |
| 35              | Strigiformes     | Strigidae     | <i>Strix</i>           | <i>varia</i>        | <i>occidentalis</i>  |
| 36              | Caprimulgiformes | Caprimulgidae | <i>Chordeiles</i>      | <i>minor</i>        | <i>acutipennis</i>   |
| 37              | Apodiformes      | Trochilidae   | <i>Phaethornis</i>     | <i>longirostris</i> | <i>striigularis</i>  |
| 38              | Apodiformes      | Trochilidae   | <i>Colibri</i>         | <i>coruscans</i>    | <i>thalassinus</i>   |
| 39              | Apodiformes      | Trochilidae   | <i>Amazilia</i>        | <i>tzacatl</i>      | <i>francaiae</i>     |
| 40              | Apodiformes      | Trochilidae   | <i>Amazilia</i>        | <i>beryllina</i>    | <i>violiceps</i>     |
| 41              | Apodiformes      | Trochilidae   | <i>Lampornis</i>       | <i>clemenciae</i>   | <i>amethystinus</i>  |
| 42              | Apodiformes      | Trochilidae   | <i>Calypte</i>         | <i>anna</i>         | <i>costae</i>        |
| 43              | Apodiformes      | Trochilidae   | <i>Selasphorus</i>     | <i>rufus</i>        | <i>calliope</i>      |
| 44              | Coraciiformes    | Alcedinidae   | <i>Halcyon</i>         | <i>pileata</i>      | <i>smyrnensis</i>    |
| 45              | Coraciiformes    | Alcedinidae   | <i>Chloroceryle</i>    | <i>inda</i>         | <i>americana</i>     |
| 46              | Coraciiformes    | Meropidae     | <i>Merops</i>          | <i>apiaster</i>     | <i>persicus</i>      |
| 47              | Bucerotiformes   | Bucerotidae   | <i>Bycanistes</i>      | <i>albotibialis</i> | <i>fistulator</i>    |
| 48              | Piciformes       | Ramphastidae  | <i>Ramphastos</i>      | <i>tucanus</i>      | <i>vitellinus</i>    |
| 49              | Piciformes       | Megalaimidae  | <i>Psilopogon</i>      | <i>pyrolophus</i>   | <i>oorti</i>         |
| 50              | Piciformes       | Lybiidae      | <i>Pogoniulus</i>      | <i>bilineatus</i>   | <i>leucomystax</i>   |
| 51              | Piciformes       | Lybiidae      | <i>Lybius</i>          | <i>melanopterus</i> | <i>torquatus</i>     |



|    |                |                  |                       |                        |                        |
|----|----------------|------------------|-----------------------|------------------------|------------------------|
| 52 | Piciformes     | Lybiidae         | <i>Trachyphonus</i>   | <i>erythrocephalus</i> | <i>darnaudii</i>       |
| 53 | Piciformes     | Indicatoridae    | <i>Indicator</i>      | <i>variegatus</i>      | <i>meliphilus</i>      |
| 54 | Piciformes     | Indicatoridae    | <i>Indicator</i>      | <i>indicator</i>       | <i>minor</i>           |
| 55 | Piciformes     | Picidae          | <i>Melanerpes</i>     | <i>lewis</i>           | <i>erythrocephalus</i> |
| 56 | Piciformes     | Picidae          | <i>Sphyrapicus</i>    | <i>thyroideus</i>      | <i>nuchalis</i>        |
| 57 | Piciformes     | Picidae          | <i>Dendrocopos</i>    | <i>major</i>           | <i>leucotos</i>        |
| 58 | Piciformes     | Picidae          | <i>Picoides</i>       | <i>arcticus</i>        | <i>dorsalis</i>        |
| 59 | Piciformes     | Picidae          | <i>Picus</i>          | <i>viridis</i>         | <i>canus</i>           |
| 60 | Falconiformes  | Falconidae       | <i>Falco</i>          | <i>peregrinus</i>      | <i>biarmicus</i>       |
| 61 | Psittaciformes | Psittaculidae    | <i>Platycercus</i>    | <i>elegans</i>         | <i>eximius</i>         |
| 62 | Psittaciformes | Psittaculidae    | <i>Trichoglossus</i>  | <i>moluccanus</i>      | <i>chlorolepidotus</i> |
| 63 | Passeriformes  | Furnariidae      | <i>Synallaxis</i>     | <i>gujanensis</i>      | <i>albigularis</i>     |
| 64 | Passeriformes  | Dendrocolaptidae | <i>Dendrocincla</i>   | <i>merula</i>          | <i>fuliginosa</i>      |
| 65 | Passeriformes  | Dendrocolaptidae | <i>Dendrocolaptes</i> | <i>picumnus</i>        | <i>certhia</i>         |
| 66 | Passeriformes  | Dendrocolaptidae | <i>Xiphorhynchus</i>  | <i>lachrymosus</i>     | <i>susurrans</i>       |
| 67 | Passeriformes  | Thamnophilidae   | <i>Thamnophilus</i>   | <i>doliatus</i>        | <i>aethiops</i>        |
| 68 | Passeriformes  | Tyrannidae       | <i>Todirostrum</i>    | <i>chrysocrotaphum</i> | <i>maculatum</i>       |
| 69 | Passeriformes  | Tyrannidae       | <i>Contopus</i>       | <i>pertinax</i>        | <i>sordidulus</i>      |
| 70 | Passeriformes  | Tyrannidae       | <i>Empidonax</i>      | <i>traillii</i>        | <i>alnorum</i>         |
| 71 | Passeriformes  | Tyrannidae       | <i>Empidonax</i>      | <i>wrightii</i>        | <i>oberholseri</i>     |
| 72 | Passeriformes  | Tyrannidae       | <i>Tyrannus</i>       | <i>vociferans</i>      | <i>verticalis</i>      |
| 73 | Passeriformes  | Climacteridae    | <i>Climacteris</i>    | <i>picumnus</i>        | <i>erythroops</i>      |
| 74 | Passeriformes  | Meliphagidae     | <i>Phylidonyris</i>   | <i>novaehollandiae</i> | <i>niger</i>           |
| 75 | Passeriformes  | Meliphagidae     | <i>Philemon</i>       | <i>corniculatus</i>    | <i>citreogularis</i>   |
| 76 | Passeriformes  | Meliphagidae     | <i>Melithreptus</i>   | <i>lunatus</i>         | <i>brevirostris</i>    |
| 77 | Passeriformes  | Meliphagidae     | <i>Anthochaera</i>    | <i>carunculata</i>     | <i>phrygia</i>         |
| 78 | Passeriformes  | Meliphagidae     | <i>Manorina</i>       | <i>melanocephala</i>   | <i>flavigula</i>       |
| 79 | Passeriformes  | Pardalotidae     | <i>Pardalotus</i>     | <i>striatus</i>        | <i>punctatus</i>       |
| 80 | Passeriformes  | Acanthizidae     | <i>Sericornis</i>     | <i>magnirostra</i>     | <i>citreogularis</i>   |
| 81 | Passeriformes  | Malaconotidae    | <i>Tchagra</i>        | <i>senegalus</i>       | <i>australis</i>       |
| 82 | Passeriformes  | Laniidae         | <i>Lanius</i>         | <i>minor</i>           | <i>collurio</i>        |

|                  |               |                |                     |                      |                        |
|------------------|---------------|----------------|---------------------|----------------------|------------------------|
| 83               | Passeriformes | Vireonidae     | <i>Vireo</i>        | <i>olivaceus</i>     | <i>gilvus</i>          |
| 83 <sup>2</sup>  | Passeriformes | Vireonidae     | <i>Vireo</i>        | <i>olivaceus</i>     | <i>philadelphicus</i>  |
| 84               | Passeriformes | Oriolidae      | <i>Oriolus</i>      | <i>auratus</i>       | <i>oriolus</i>         |
| 85               | Passeriformes | Corvidae       | <i>Cyanocitta</i>   | <i>stelleri</i>      | <i>cristata</i>        |
| 86               | Passeriformes | Corvidae       | <i>Aphelocoma</i>   | <i>wollweberi</i>    | <i>woodhouseii</i>     |
| 87               | Passeriformes | Corvidae       | <i>Pyrrhocorax</i>  | <i>pyrrhocorax</i>   | <i>graculus</i>        |
| 88               | Passeriformes | Corvidae       | <i>Corvus</i>       | <i>culminatus</i>    | <i>splendens</i>       |
| 89               | Passeriformes | Corvidae       | <i>Corvus</i>       | <i>corone</i>        | <i>cornix</i>          |
| 90               | Passeriformes | Corvidae       | <i>Corvus</i>       | <i>coronoides</i>    | <i>mellori</i>         |
| 91               | Passeriformes | Paridae        | <i>Poecile</i>      | <i>palustris</i>     | <i>montanus</i>        |
| 92               | Passeriformes | Paridae        | <i>Poecile</i>      | <i>atricapillus</i>  | <i>gambeli</i>         |
| 93               | Passeriformes | Pycnonotidae   | <i>Pycnonotus</i>   | <i>tricolor</i>      | <i>nigricans</i>       |
| 94               | Passeriformes | Hirundinidae   | <i>Tachycineta</i>  | <i>bicolor</i>       | <i>thalassina</i>      |
| 95               | Passeriformes | Phylloscopidae | <i>Phylloscopus</i> | <i>humei</i>         | <i>trochiloides</i>    |
| 96               | Passeriformes | Acrocephalidae | <i>Acrocephalus</i> | <i>schoenobaenus</i> | <i>paludicola</i>      |
| 97               | Passeriformes | Acrocephalidae | <i>Acrocephalus</i> | <i>palustris</i>     | <i>scirpaceus</i>      |
| 98               | Passeriformes | Leiothrichidae | <i>Turdoides</i>    | <i>hartlaubii</i>    | <i>jardineii</i>       |
| 99               | Passeriformes | Sylviidae      | <i>Sylvia</i>       | <i>atricapilla</i>   | <i>borin</i>           |
| 100              | Passeriformes | Sylviidae      | <i>Sylvia</i>       | <i>ruppeli</i>       | <i>cantillans</i>      |
| 100 <sup>2</sup> | Passeriformes | Sylviidae      | <i>Sylvia</i>       | <i>ruppeli</i>       | <i>melanocephala</i>   |
| 101              | Passeriformes | Regulidae      | <i>Regulus</i>      | <i>calendula</i>     | <i>satrapa</i>         |
| 102              | Passeriformes | Troglodytidae  | <i>Troglodytes</i>  | <i>aedon</i>         | <i>solstitialis</i>    |
| 103              | Passeriformes | Sittidae       | <i>Sitta</i>        | <i>castanea</i>      | <i>frontalis</i>       |
| 104              | Passeriformes | Certhiidae     | <i>Certhia</i>      | <i>familiaris</i>    | <i>brachydactyla</i>   |
| 105              | Passeriformes | Sturnidae      | <i>Sturnus</i>      | <i>unicolor</i>      | <i>vulgaris</i>        |
| 106              | Passeriformes | Buphagidae     | <i>Buphagus</i>     | <i>africanus</i>     | <i>erythrorhynchus</i> |
| 107              | Passeriformes | Turdidae       | <i>Sialia</i>       | <i>currucoides</i>   | <i>sialis</i>          |
| 108              | Passeriformes | Turdidae       | <i>Turdus</i>       | <i>merula merula</i> | <i>iliacus</i>         |
| 109              | Passeriformes | Muscicapidae   | <i>Luscinia</i>     | <i>luscinia</i>      | <i>megarhynchus</i>    |
| 110              | Passeriformes | Muscicapidae   | <i>Ficedula</i>     | <i>albicollis</i>    | <i>hypoleuca</i>       |
| 111              | Passeriformes | Muscicapidae   | <i>Phoenicurus</i>  | <i>ochruros</i>      | <i>phoenicurus</i>     |

|                  |               |               |                     |                       |                      |
|------------------|---------------|---------------|---------------------|-----------------------|----------------------|
| 112              | Passeriformes | Muscicapidae  | <i>Saxicola</i>     | <i>rubicola</i>       | <i>rubetra</i>       |
| 113              | Passeriformes | Muscicapidae  | <i>Oenanthe</i>     | <i>isabellina</i>     | <i>oenanthe</i>      |
| 113 <sup>2</sup> | Passeriformes | Muscicapidae  | <i>Oenanthe</i>     | <i>pileata</i>        | <i>oenanthe</i>      |
| 114              | Passeriformes | Muscicapidae  | <i>Oenanthe</i>     | <i>deserti</i>        | <i>pleschanka</i>    |
| 115              | Passeriformes | Muscicapidae  | <i>Oenanthe</i>     | <i>finschii</i>       | <i>lugens</i>        |
| 115 <sup>2</sup> | Passeriformes | Muscicapidae  | <i>Oenanthe</i>     | <i>finschii</i>       | <i>chrysopygia</i>   |
| 116              | Passeriformes | Nectariniidae | <i>Cinnyris</i>     | <i>afer</i>           | <i>chalybeus</i>     |
| 116 <sup>2</sup> | Passeriformes | Nectariniidae | <i>Cinnyris</i>     | <i>fuscus</i>         | <i>chalybeus</i>     |
| 117              | Passeriformes | Passeridae    | <i>Passer</i>       | <i>domesticus</i>     | <i>montanus</i>      |
| 117 <sup>2</sup> | Passeriformes | Passeridae    | <i>Passer</i>       | <i>hispaniolensis</i> | <i>montanus</i>      |
| 118              | Passeriformes | Ploceidae     | <i>Ploceus</i>      | <i>xanthops</i>       | <i>velatus</i>       |
| 119              | Passeriformes | Ploceidae     | <i>Euplectes</i>    | <i>ardens</i>         | <i>orix</i>          |
| 120              | Passeriformes | Prunellidae   | <i>Prunella</i>     | <i>fulvescens</i>     | <i>atrogularis</i>   |
| 121              | Passeriformes | Motacillidae  | <i>Motacilla</i>    | <i>capensis</i>       | <i>clara</i>         |
| 122              | Passeriformes | Motacillidae  | <i>Motacilla</i>    | <i>grandis</i>        | <i>alba</i>          |
| 123              | Passeriformes | Motacillidae  | <i>Anthus</i>       | <i>spinoletta</i>     | <i>pratensis</i>     |
| 124              | Passeriformes | Fringillidae  | <i>Fringilla</i>    | <i>montifringilla</i> | <i>coelebs</i>       |
| 125              | Passeriformes | Fringillidae  | <i>Haemorhous</i>   | <i>mexicanus</i>      | <i>purpureus</i>     |
| 126              | Passeriformes | Fringillidae  | <i>Astragalinus</i> | <i>psaltria</i>       | <i>lawrencei</i>     |
| 127              | Passeriformes | Parulidae     | <i>Leiothlypis</i>  | <i>celata</i>         | <i>virginiae</i>     |
| 128              | Passeriformes | Parulidae     | <i>Setophaga</i>    | <i>tigrina</i>        | <i>americana</i>     |
| 129              | Passeriformes | Parulidae     | <i>Setophaga</i>    | <i>aestiva</i>        | <i>magnolia</i>      |
| 130              | Passeriformes | Parulidae     | <i>Setophaga</i>    | <i>pinus</i>          | <i>dominica</i>      |
| 131              | Passeriformes | Icteridae     | <i>Sturnella</i>    | <i>defilippii</i>     | <i>superciliaris</i> |
| 132              | Passeriformes | Icteridae     | <i>Icterus</i>      | <i>parisorum</i>      | <i>abeillei</i>      |
| 133              | Passeriformes | Icteridae     | <i>Agelaius</i>     | <i>phoeniceus</i>     | <i>tricolor</i>      |
| 134              | Passeriformes | Emberizidae   | <i>Zonotrichia</i>  | <i>leucophrys</i>     | <i>albicollis</i>    |
| 135              | Passeriformes | Emberizidae   | <i>Junco</i>        | <i>phaeonotus</i>     | <i>hyemalis</i>      |
| 136              | Passeriformes | Emberizidae   | <i>Melospiza</i>    | <i>melodia</i>        | <i>lincolnii</i>     |
| 136 <sup>2</sup> | Passeriformes | Emberizidae   | <i>Melospiza</i>    | <i>melodia</i>        | <i>georgiana</i>     |
| 137              | Passeriformes | Emberizidae   | <i>Ammodramus</i>   | <i>maritimus</i>      | <i>caudacutus</i>    |

|     |               |              |                    |                      |                  |
|-----|---------------|--------------|--------------------|----------------------|------------------|
| 138 | Passeriformes | Thraupidae   | <i>Ramphocelus</i> | <i>nigrogularis</i>  | <i>carbo</i>     |
| 139 | Passeriformes | Thraupidae   | <i>Thraupis</i>    | <i>sayaca</i>        | <i>palmarum</i>  |
| 140 | Passeriformes | Thraupidae   | <i>Tangara</i>     | <i>icterocephala</i> | <i>gyrola</i>    |
| 141 | Passeriformes | Thraupidae   | <i>Diglossa</i>    | <i>lafresnayii</i>   | <i>humeralis</i> |
| 142 | Passeriformes | Cardinalidae | <i>Cardinalis</i>  | <i>cardinalis</i>    | <i>sinuatus</i>  |

---

<sup>1</sup> references for dominance and phylogenetic relationships are included in the dataset, available at Dryad

<sup>2</sup> see Supplemental Methods for an explanation of cases where one phylogenetically-independent comparison consisted of more than two species

### **Literature reviewed for behavioral dominance relationships**

Ali, S., and S. D. Ripley. 1978-1999. Handbook of the birds of India and Pakistan. Volumes 1-10. Second edition. Oxford University Press, New Delhi, India.

Alström, P., and K. Mild. 2003. Pipits and wagtails. Princeton University Press, Princeton, New Jersey, USA.

Brown, L. H., E. K. Urban, and K. Newman, eds. 1982. The birds of Africa. Volume I. Academic Press, San Diego, California, USA.

Cramp, S., ed. 1977. The birds of the Western Palearctic. Vol. I. Ostrich to ducks. Oxford University Press, Oxford, UK.

Cramp, S., ed. 1980. The birds of the Western Palearctic. Vol. II. Hawks to bustards. Oxford University Press, Oxford, UK.

Cramp, S., ed. 1983. The birds of the Western Palearctic. Vol. III. Waders to gulls. Oxford University Press, Oxford, UK.

Cramp, S., ed. 1985. The birds of the Western Palearctic. Vol. IV. Terns to woodpeckers. Oxford University Press, Oxford, UK.

Cramp, S., ed. 1988. The birds of the Western Palearctic. Vol. V. Tyrant flycatchers to thrushes. Oxford University Press, Oxford, UK.

Cramp, S., ed. 1992. The birds of the Western Palearctic. Vol. VI. Warblers. Oxford University Press, Oxford, UK.

Cramp, S., and C. M. Perrins, eds. 1993. The birds of the Western Palearctic. Vol. VII. Flycatchers to shrikes. Oxford University Press, Oxford, UK.

Cramp, S., and C. M. Perrins, eds. 1994. The birds of the Western Palearctic. Vol. VIII. Crows to finches. Oxford University Press, Oxford, UK.

Cramp, S., and C. M. Perrins, eds. 1994. The birds of the Western Palearctic. Vol. IX. Buntings and New World warblers. Oxford University Press, Oxford, UK.

Frith, C. B., and D. W. Frith. 2004. The bowerbirds, Ptilonorhynchidae. Oxford University Press, Oxford, UK.

Fry, C. H., S. Keith, and E. K. Urban, eds. 1988. The birds of Africa. Volume III. Academic Press, San Diego, California, USA.

Fry, C. H., S. Keith, and E. K. Urban, eds. 2000. The birds of Africa. Volume VI. Academic Press, San Diego, California, USA.

Fry, C. H., S. Keith, and E. K. Urban, eds. 2004. The birds of Africa. Volume VII. Princeton University Press, Princeton, New Jersey, USA.

Harris, T., and G. Arnott. 1988. Shrikes of southern Africa. Struik Winchester, Cape Town, South Africa.

Higgins, P. J., and S. J. J. F. Davies, eds. 1996. Handbook of Australian, New Zealand and Antarctic Birds. Volume 3: Snipe to pigeons. Oxford University Press, Melbourne, Australia.

Higgins, P. J., ed. 1999. Handbook of Australian, New Zealand and Antarctic Birds. Volume 4: Parrots to dollarbird. Oxford University Press, Melbourne, Australia.

Higgins, P. J., J. M. Peter, and W. K. Steele, eds. 2001. Handbook of Australian, New Zealand and Antarctic birds. Volume 5: Tyrant-flycatchers to chats. Oxford University Press, Melbourne, Australia.

Higgins, P. J., and J. M. Peter, eds. 2002. Handbook of Australian, New Zealand and Antarctic Birds. Volume 6: Pardalotes to shrike-thrushes. Oxford University Press, Melbourne, Australia.

Higgins, P. J., J. M. Peter, and S. J. Cowling, eds. 2006. Handbook of Australian, New Zealand and Antarctic Birds. Volume 7: Boatbill to starlings. Oxford University Press, Melbourne, Australia.

Keith, S., E. K. Urban, and C. H. Fry, eds. 1992. The birds of Africa. Volume IV. Academic Press, San Diego, California, USA.

Marchant, S., and P. J. Higgins, eds. 1990. Handbook of Australian, New Zealand and Antarctic Birds. Volume 1: Ratites to ducks. Oxford University Press, Melbourne, Australia.

Marchant, S., and P. J. Higgins, eds. 1993. Handbook of Australian, New Zealand and Antarctic Birds. Volume 2: Raptors to lapwings. Oxford University Press, Melbourne, Australia.

Poole, A., ed. 2015. The birds of North America online. Cornell Lab of Ornithology, Ithaca, New York, USA. Retrieved from <http://bna.birds.cornell.edu/bna/>.

Pratt, H. D. 2005. The Hawaiian honeycreepers. Oxford University Press, Oxford, UK.

- Roberts, T. J. 1991-1992. The birds of Pakistan. Volume 1 and 2. Oxford University Press, Oxford, UK.
- Safford, R., and F. Hawkins, eds. 2013. The birds of Africa. Volume VIII. Christopher Helm, London, UK.
- Shirihai, H., G. Gargallo, and A. J. Helbig. 2001. Sylvia warblers. Princeton University Press, Princeton, NJ.
- Short, L. L., and J. F. M. Horne. 2001. Toucans, barbets and honeyguides. Oxford University Press, Oxford, UK.
- Skead, C. J. 1967. Sunbirds of southern Africa, also the sugarbirds, the white-eyes and the spotted creeper. South African Bird Book Fund, A.A. Balkema, Cape Town, South Africa.
- Urban, E. K., C. H. Fry, and S. Keith, eds. 1986. The birds of Africa. Volume II. Academic Press, San Diego, California, USA.
- Urban, E. K., C. H. Fry, and S. Keith, eds. 1997. The birds of Africa. Volume V. Academic Press, San Diego, California, USA.
- Wells, D. R. 1999. The birds of the Thai-Malay Peninsula. Volume one: non-passerines. Academic Press, San Diego, California, USA.
- Wells, D. R. 2007. The birds of the Thai-Malay Peninsula. Volume two: passerines. Christopher Helm, London, UK.

## References used for assessing breeding range overlap of cities

Alström, P. and K. Mild. 2003. Pipits and wagtails. Princeton University Press, Princeton, New Jersey, USA.

Benson, K.L.P. and K.A. Arnold. 2001. The Texas Breeding Bird Atlas. Texas A&M University System, College Station and Corpus Christi, Texas, USA (<http://txtbba.tamu.edu>).

BirdLife International and NatureServe. 2011. Bird species distribution maps of the world. BirdLife International, Cambridge, UK and NatureServe, Arlington, Virginia, USA.

Bird Studies Canada. 2016. Manitoba Breeding Bird Atlas. <http://www.birdatlas.mb.ca/>

Brazil, M. 2009. Birds of east Asia: China, Taiwan, Korea, Japan, and Russia. Princeton University Press, Princeton, New Jersey, USA.

Cramp, S. (ed.) 1977. The birds of the Western Palearctic. Vol. I. Ostrich to ducks. Oxford University Press, Oxford, UK.

Cramp, S. (ed.) 1980. The birds of the Western Palearctic. Vol. II. Hawks to bustards. Oxford University Press, Oxford, UK.

Cramp, S. (ed.) 1983. The birds of the Western Palearctic. Vol. III. Waders to gulls Oxford University Press, Oxford, UK.

Cramp, S. (ed.) 1985. The birds of the Western Palearctic. Vol. IV. Terns to woodpeckers. Oxford University Press, Oxford, UK.

Cramp, S. (ed.) 1988. The birds of the Western Palearctic. Vol. V. Tyrant flycatchers to thrushes. Oxford University Press, Oxford, UK.

Cramp, S. (ed.) 1992. The birds of the Western Palearctic. Vol. VI. Warblers. Oxford University Press, Oxford, UK.

Cramp, S. and C.M. Perrins. (eds.) 1993. The birds of the Western Palearctic. Vol. VII. Flycatchers to shrikes. Oxford University Press, Oxford, UK.

Cramp, S. and C.M. Perrins. (eds.) 1994. The birds of the Western Palearctic. Vol. VIII. Crows to finches. Oxford University Press, Oxford, UK.

Cramp, S. and C.M. Perrins. (eds.) 1994. The birds of the Western Palearctic. Vol. IX. Buntings and New World warblers. Oxford University Press, Oxford, UK.



- Davidson, P.J.A., R.J. Cannings, A.R. Couturier, D. Lepage, and C.M. Di Corrado (eds.). 2015. The atlas of the breeding birds of British Columbia, 2008-2012. Bird Studies Canada, Delta, British Columbia, Canada. <http://www.birdatlas.bc.ca/>
- del Hoyo, J., A. Elliott, J. Sargatal, D.A. Christie, and E. de Juana. (eds.) 2016. Handbook of the Birds of the World Alive. Lynx Edicions, Barcelona. (retrieved from <http://www.hbw.com/>).
- Florida Fish and Wildlife Conservation Commission. 2003. Florida's breeding bird atlas: A collaborative study of Florida's birdlife. <http://myfwc.com/bba> (Accessed 2016).
- Garrido, O.H. and A. Kirkconnell. 2000. Field guide to the birds of Cuba. Cornell University Press, Ithaca, New York, USA.
- Higgins, P.J. and S.J.J.F. Davies. (eds.) 1996. Handbook of Australian, New Zealand and Antarctic Birds. Volume 3: Snipe to pigeons. Oxford University Press, Melbourne, Australia.
- Higgins, P.J. (ed.) 1999. Handbook of Australian, New Zealand and Antarctic Birds. Volume 4: Parrots to dollarbird. Oxford University Press, Melbourne, Australia.
- Higgins, P.J., J.M. Peter, and W.K. Steele. (eds.) 2001. Handbook of Australian, New Zealand and Antarctic birds. Volume 5: Tyrant-flycatchers to chats. Oxford University Press, Melbourne, Australia.
- Higgins, P.J. and J.M. Peter. (eds.) 2002. Handbook of Australian, New Zealand and Antarctic Birds. Volume 6: Pardalotes to shrike-thrushes. Oxford University Press, Melbourne, Australia.
- Higgins, P.J., J.M. Peter, and S.J. Cowling. (eds.) 2006. Handbook of Australian, New Zealand and Antarctic Birds. Volume 7: Boatbill to starlings. Oxford University Press, Melbourne, Australia.
- Hilty, S.L. 2003. Birds of Venezuela. Second edition. Princeton University Press, Princeton, New Jersey, USA.
- Hilty, S.L. and W.L. Brown. 1986. A guide to the birds of Colombia. Princeton University Press, Princeton, New Jersey, USA.
- Howell, S.N.G. and S. Webb. 1995. A guide to the birds of Mexico and northern Central America. Oxford University Press, Oxford, UK.
- Jaramillo, A. 2003. Birds of Chile, including the Antarctic Peninsula, the Falkland Islands and South Georgia. A & C Black Publishers, Ltd., London, UK.

Jacobs, B. and J.D. Wilson. 1997. Missouri Breeding Bird Atlas, 1986-1992. Missouri Department of Conservation, Jefferson City, Missouri, USA.

Kazmierczak, K. and B. van Perlo. 2000. A field guide to the birds of the Indian subcontinent. Yale University Press, New Haven, Connecticut, USA.

MacKinnon, J. and K. Phillipps. 2000. A field guide to the birds of China. Oxford University Press, Oxford, UK.

Marchant, S. and P.J. Higgins. (eds.) 1990. Handbook of Australian, New Zealand and Antarctic Birds. Volume 1: Ratites to ducks. Oxford University Press, Melbourne, Australia.

Marchant, S. and P.J. Higgins. (eds.) 1993. Handbook of Australian, New Zealand and Antarctic Birds. Volume 2: Raptors to lapwings. Oxford University Press, Melbourne, Australia.

Narosky, T. and D. Yzurieta. 1989. Birds of Argentina and Uruguay. A field guide. Asociación Ornitológica del Plata, Buenos Aires, Argentina.

Porter, R.F., S. Christensen, and P. Schiermacker-Hansen. 1996. Birds of the Middle East. Princeton University Press, Princeton, New Jersey, USA.

Raffaele, H., J. Wiley, O. Garrido, A. Keith, and J. Raffaele. 2003. Birds of the West Indies. Princeton University Press, Princeton, New Jersey, USA.

Ridgely, R.S. and P.J. Greenfield. 2001. The birds of Ecuador. Volume II. Cornell University Press, Ithaca, New York, USA.

Robson, C. 2002. Birds of Thailand. Princeton University Press, Princeton, New Jersey, USA.

Safford, R. and F. Hawkins. (eds.) 2013. The birds of Africa. Volume VIII. Christopher Helm, London, UK.

Schulenberg, T.S., D.F. Stotz, D.F. Lane, J.P. O'Neill, and T.A. Parker III. 2007. Birds of Peru. Princeton University Press, Princeton, New Jersey, USA.

Sibley, D.A. 2014. The Sibley guide to birds. Second edition. Alfred A. Knopf, New York, USA.

- Sinclair, I., P. Hockey, and W. Tarboton. 2002. Sasol birds of southern Africa. Struik Publishers, Cape Town, South Africa.
- Sinclair, I. and P. Ryan. 2003. Birds of Africa south of the Sahara. Princeton University Press, Princeton, New Jersey, USA.
- Strange, M. 2000. A photographic guide to the birds of southeast Asia. Princeton University Press, Princeton, New Jersey, USA.
- Strange, M. 2001. A photographic guide to the birds of Indonesia. Princeton University Press, Princeton, New Jersey, USA.
- van Perlo, B. 2009. A field guide to the birds of Brazil. Oxford University Press, Oxford, UK.
- Wiedenfeld, D.A. and M.M. Swan. 2000. Louisiana Breeding Bird Atlas. Louisiana Sea Grant College Program, Louisiana State University, Baton Rouge, Louisiana, USA (<http://www.manybirds.com/atlas/atlas.htm>).
